# Supplementary material for: Early prediction of in-hospital mortality in acute pancreatitis: a retrospective observational cohort study based on a large multicentre critical care database
Source: PubMed Central journal article supplement — BMJ Open. 2020 Dec 23;10(12):e041893. doi: 10.1136/bmjopen-2020-041893 (PMC7759962; doi:10.1136/bmjopen-2020-041893), 2020-12-23
Supplement: bmjopen-2020-041893.draft_revisions.pdf [file bmjopen-2020-041893.draft_revisions.pdf]

# BMJ Open

BMJ Open is committed to open peer review. As part of this commitment we make the peer review history of every article we publish publicly available.

When an article is published we post the peer reviewers' comments and the authors' responses online. We also post the versions of the paper that were used during peer review. These are the versions that the peer review comments apply to.

The versions of the paper that follow are the versions that were submitted during the peer review process. They are not the versions of record or the final published versions. They should not be cited or distributed as the published version of this manuscript.

BMJ Open is an open access journal and the full, final, typeset and author-corrected version of record of the manuscript is available on our site with no access controls, subscription charges or pay-per-view fees (<http://bmjopen.bmj.com>).

If you have any questions on BMJ Open's open peer review process please email [info.bmjopen@bmj.com](mailto:info.bmjopen@bmj.com)

# BMJ Open

## Early prediction of in-hospital mortality in acute pancreatitis: A retrospective study based on a large multicentre critical care database

|                               |                                                                                                                                                                                                                                                                                                                                         |
|-------------------------------|-----------------------------------------------------------------------------------------------------------------------------------------------------------------------------------------------------------------------------------------------------------------------------------------------------------------------------------------|
| Journal:                      | <i>BMJ Open</i>                                                                                                                                                                                                                                                                                                                         |
| Manuscript ID                 | bmjopen-2020-041893                                                                                                                                                                                                                                                                                                                     |
| Article Type:                 | Original research                                                                                                                                                                                                                                                                                                                       |
| Date Submitted by the Author: | 19-Jun-2020                                                                                                                                                                                                                                                                                                                             |
| Complete List of Authors:     | li, caifeng; Tianjin Medical University General Hospital, Department of critical medicine<br>Ren, Qian; Tianjin Daily, Advertising center<br>Wang, Zhiqiang; Tianjin Medical University General Hospital, Department of critical medicine<br>wang, guolin; Tianjin Medical University General Hospital, Department of critical medicine |
| Keywords:                     | Pancreatic disease < GASTROENTEROLOGY, Adult intensive & critical care < INTENSIVE & CRITICAL CARE, Gastroenterology < INTERNAL MEDICINE                                                                                                                                                                                                |
|                               |                                                                                                                                                                                                                                                                                                                                         |

SCHOLARONE™  
Manuscripts

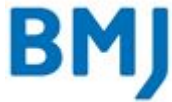

I, the Submitting Author has the right to grant and does grant on behalf of all authors of the Work (as defined in the below author licence), an exclusive licence and/or a non-exclusive licence for contributions from authors who are: i) UK Crown employees; ii) where BMJ has agreed a CC-BY licence shall apply, and/or iii) in accordance with the terms applicable for US Federal Government officers or employees acting as part of their official duties; on a worldwide, perpetual, irrevocable, royalty-free basis to BMJ Publishing Group Ltd ("BMJ") its licensees and where the relevant Journal is co-owned by BMJ to the co-owners of the Journal, to publish the Work in this journal and any other BMJ products and to exploit all rights, as set out in our [licence](#).

The Submitting Author accepts and understands that any supply made under these terms is made by BMJ to the Submitting Author unless you are acting as an employee on behalf of your employer or a postgraduate student of an affiliated institution which is paying any applicable article publishing charge ("APC") for Open Access articles. Where the Submitting Author wishes to make the Work available on an Open Access basis (and intends to pay the relevant APC), the terms of reuse of such Open Access shall be governed by a Creative Commons licence – details of these licences and which [Creative Commons](#) licence will apply to this Work are set out in our licence referred to above.

Other than as permitted in any relevant BMJ Author's Self Archiving Policies, I confirm this Work has not been accepted for publication elsewhere, is not being considered for publication elsewhere and does not duplicate material already published. I confirm all authors consent to publication of this Work and authorise the granting of this licence.

1  
2  
3  
4 **1 Early prediction of in-hospital**  
5  
6  
7 **2 mortality in acute pancreatitis: A**  
8  
9 **3 retrospective study based on a large multicentre critical care**  
10  
11 **4 database**

15 Caifeng Li<sup>1</sup>¶, Qian Ren<sup>2</sup>, Zhiqiang Wang<sup>1</sup>, Guolin Wang<sup>1</sup>\*

18 <sup>1</sup> Department of critical medicine, Tianjin Medical University General Hospital, Tianjin, China

21 <sup>2</sup>Advertising Center, Tianjin Daily, Tianjin, China

23 ¶ First author: Caifeng Li, E-mail: [lcftianyineifenmi@163.com](mailto:lcftianyineifenmi@163.com), Address: NO.154, Anshan Road, Heping  
24  
25  
26 District, Tianjin, China

28 \* Corresponding author: Guolin Wang, E-mail: [wgl202@qq.com](mailto:wgl202@qq.com), Address: NO.154, Anshan Road,  
29  
30  
31 Heping District, Tianjin, China



## 1 Abstract

2 **Objective:** To develop and validate a prediction model for predicting in-hospital mortality in patients  
3 with acute pancreatitis (AP).

4 **Design:** A retrospective study based on a large multicentre critical care database.

5 **Setting:** All subject data were collected from the eICU Collaborative Research Database (eICU-CRD),  
6 which covers 200,859 ICU admissions of 139,367 patients in 208 US hospitals between 2014 and 2015.

7 **Participants:** A total of 746 patients with AP were drawn from eICU-CRD. Due to loss to follow-up  
8 (4 patients) or incomplete data (364 patients), 378 patients were enrolled in the primary cohort to  
9 establish a nomogram model and conduct internal validation.

10 **Primary and secondary outcome measures:** The outcome of the prediction model was in-  
11 hospital mortality. All risk factors found significant in the univariate analysis were considered for  
12 multivariate analysis to adjust for confounding factors. Then a nomogram model was established. The  
13 performance of the nomogram model was evaluated by the concordance index (C-index) and the  
14 calibration plot. The nomogram model was internally validated using the bootstrap resampling method.  
15 The predictive accuracy of the nomogram model was compared with that of Acute Physiology, Age, and  
16 Chronic Health Evaluation (APACHE) IV. Decision curve analysis (DCA) was performed to evaluate  
17 and compare the potential net benefit using of different predictive models.

18 **Results:** The overall in-hospital mortality rate is 4.447%. Age, BUN, and lactate (ABL) were the  
19 independent risk factors determined by multivariate analysis. The C-index of nomogram model ABL was  
20 similar to that of APACHE IV [0.896 (95% confidence interval [CI]: 0.861 to 0.925),  $P=0.499$ ], showing  
21 a comparable discriminating power. Calibration plot demonstrated good agreement between the

1 predicted and actual in-hospital mortality. DCA showed that the nomogram model ABL was clinically  
2 useful.

3 **Conclusions:** Nomogram model ABL, which used readily available data, exhibited high predictive  
4 value for predicting in-hospital mortality in AP.

## 5 **Strengths and limitations of this study**

6 This is an original research to develop and internally validate a user-friendly prediction model using  
7 easily obtainable clinical and laboratory parameters.

8 The nomogram model ABL presents an excellent prognostic ability for predicting in-hospital mortality  
9 in AP patients.

10 The retrospective study design could lead to certain types of bias (e.g., confounding bias, selection bias).

11 The suitability of the model in larger population needs further external validation.

## 12 **Background**

13 AP is a relatively common, but poorly understood, inflammatory disease of the exocrine pancreas. So  
14 far, the detailed pathogenesis of AP still remains unclear and no specific and effective treatment has been  
15 proposed yet [1]. The clinical manifestation and disease course of AP also vary dramatically from self-  
16 limiting simple edema pancreatitis to severe acute necrotizing pancreatitis characterized by systemic  
17 inflammatory response syndrome and multiple organ failure [2]. With a mortality rate of less than 5%,  
18 the mild edematous AP runs a benign course and recovers spontaneously without any sequelae in about  
19 70% - 80% of patients, while nearly 20% - 30% of patients will develop severe necrotic pancreatitis with  
20 a high mortality rate up to 20% - 30% [3-9].

1 Two peaks of mortality have been noted in patients with severe AP. Early death usually occurs in the  
2 first two weeks owing to multiple organ dysfunction syndromes (MODS) caused by the production and  
3 release of diverse cytokines [9-11]. Late death generally happens two weeks later as a result of  
4 peripancreatic necrosis, infection, and secondary MODS [9, 10]. Studies found that patients in the high-  
5 risk group may benefit from closer monitoring, early aggressive fluid resuscitation, rational use of  
6 antibiotics, and timely invasive strategies, such as endoscopic sphincterotomy and radiologic  
7 intervention [12, 13]. Once diagnosed as AP, early identification of high-risk patients is therefore  
8 essential to improve survival.

9 Since the first scoring system for AP severity was proposed in 1974, about 20 different predictive models  
10 have been developed [14]. However, there are some practical problems that restrict wide clinical  
11 application of these predictive models. For instance, based on more than 10 parameters, APACHE II is  
12 cumbersome and complex for rapid assessment within 24 hours after admission [15, 16]. Moreover,  
13 APACHE II is a generic scoring system for all critical patients, so some parameters may be irrelevant to  
14 the prognosis of AP [17]. Developed as an easy-to-use risk stratification tool, the BISAP score  
15 outperforms other predictive models in specificity, but showing a suboptimal sensitivity in evaluating  
16 the severity of AP [18, 19]. Despite its high sensitivity, RANSON score is less operative because it takes  
17 at least 48 hours to be completed, resulting in a delay of triage and management [16, 20]. The computed  
18 tomography severity index (CTSI) requires high-cost and radioactive CT scans, which might be  
19 unavailable for most patients at their first visit [16, 21]. In addition, pancreatic necrosis might be  
20 undetectable by an early CT scan within 24 hours [22]. Even in the first 3-4 days, contrast-enhanced CT  
21 scan seems unreliable in estimating the extent of pancreatic necrosis [22, 23].

22 In view of the shortcomings of these currently available predictive models, there is consequently an

1 urgent need for an easy-to-use and accurate prognostic tool for predicting in-hospital mortality in AP  
2 patients. Therefore, we collected demographics, clinical factors, laboratory data from a freely available,  
3 multi-center database eICU-CRD and explored the risk factor for in-hospital mortality. Furthermore, we  
4 incorporated these independent prognostic factors and developed a nomogram model in patients with AP  
5 for better clinical guidance.

## 6 **Patients and methods**

### 7 **Study design**

8 We extracted subject data from eICU-CRD, a large multicentre critical care database. The database is  
9 publicly and freely accessible to researchers, according to data usage agreement by the review board of  
10 PhysioNet (Our record ID: 33047414). The eICU-CRD covers 200,859 ICU admissions of 139,367  
11 patients in 208 US hospitals between 2014 and 2015. All data were stored automatically and retrieved  
12 electronically through the Philips Healthcare eICU program. It includes records of demographics,  
13 physiological indexes from bedside monitors, diagnosis via International Classification of Diseases, 9th  
14 Edition, Clinical Modification (ICD-9-CM) codes, and other laboratory data obtained during routine  
15 medical care. All data were de-identified by the eICU program and anonymous to researchers before  
16 analysis [24]. As this research was an observational, retrospective study based on data from eICU-CRD,  
17 no ethical approval was required from our local ethics committee. This study was reported following the  
18 recommendations of the Transparent Reporting of a multivariable prediction model for Individual  
19 Prognosis Or Diagnosis (TRIPOD) statement [25].

## 1 **Participants**

2 The study population was drawn from eICU-CRD. According to the 2012 Atlanta Criteria, the diagnosis  
3 of AP can be made if two or more of the following criteria are present: (1) abdominal pain (acute and  
4 persistent epigastric pain usually radiating to the back); (2) serum amylase or lipase level being at least  
5 3 times greater than the normal upper limit; (3) characteristic abdominal imaging findings of AP [26].  
6 The ICD-9-CM diagnostic code used for selecting patients with AP is 577.0.

## 7 **Data retrieval**

8 All subject data within the first 24 hours after admission were collected from eICU-CRD using the  
9 Structure Query Language. The physiological variables, including body temperature (BT), heart rate  
10 (HR), mean blood pressure (MBP), and respiratory rate (RR) were obtained from the table *apacheApsVar*.  
11 The baseline characteristics such as age, gender, weight, height, APACHE IV, Glasgow Coma Scale  
12 (GCS) score, and the history of past illnesses were collected from the tables of *patient*,  
13 *apachePatientResult* and *pastHistory*. The laboratory indexes, for instance, serum albumin, lactate, base  
14 excess (BE), total bilirubin, glucose, blood urea nitrogen (BUN), white blood cell (WBC), hematocrit,  
15 platelet (PLT), calcium, lactic dehydrogenase (LDH), aspartate aminotransferase (AST), cholesterol,  
16 triglycerides, amylase, lipase, and arterial oxygen pressure (PaO<sub>2</sub>) were extracted from the table *lab*.  
17 Potential risk factors associated with in-hospital mortality were identified from previous predictive  
18 models [16, 27], from literature or guidelines [7, 14, 28, 29], and from consulting clinic medical experts.  
19 The decisions of their inclusion in the univariate logistic regression analysis were based on the following  
20 criteria that the potential risk factors: (1) were objective parameters, (2) were routinely measured in

1 medical practice, and (3) were completely recorded or missing randomly in the dataset. The worst value  
2 of each variable recorded during the first 24 hours after admission was used to analyze and establish the  
3 nomogram model.

#### 4 **Statistical analysis**

5 Continuous variables, expressed as mean with standard deviation (SD) or median with interquartile range  
6 (IQR), were analyzed using the Student t-test (for data with normal distribution) or Mann–Whitney U  
7 test (for data without normal distribution). Categorical variables, expressed as absolute numbers (n) and  
8 proportions (%), were compared using the Chi-square test or Fisher's exact test. Univariate logistic  
9 regression analysis was performed to determine the possible correlation between in-hospital mortality  
10 and potential risk factors. All significant risk factors ( $P < 0.1$ ) in the univariate logistic regression analysis  
11 were eligible for inclusion in the multivariate logistic regression analysis to adjust for confounding  
12 factors. Based on the results of the multivariate logistic regression analysis, a nomogram was constructed.  
13 The performance of the nomogram model was assessed using its calibration and discrimination.  
14 Calibration describes the level of agreement between predicted and actual risks, and is usually evaluated  
15 by calibration plot and Hosmer-Lemeshow Chi-square test [30]. Discrimination refers to the ability of a  
16 model to distinguish high-risk and low-risk patients, and is generally evaluated by C-index or area under  
17 the receiver operator characteristic curve (AUROC) [31]. In order to address overfitting and quantify  
18 optimism, the predictive model was internally validated using bootstrap resampling. Optimism represents  
19 the difference between the apparent (unadjusted) model performance and bootstrap (bias) corrected  
20 estimated model performance. Internal validation involved refitting the model to a series of 1000 random  
21 samples drawn from the original dataset with replacement, and produced an overall C-index from all

1 samples. This process adjusted the C-index for overoptimism which may arise when a model was  
2 validated with the same dataset used to build the model [32]. DCA was performed to evaluate the clinical  
3 usefulness of the nomogram model by quantifying the net benefits under different threshold probabilities.  
4 For all analyses, *P* value less than 0.05 was considered to be statistically significant. All statistical  
5 analyses were carried out on GraphPad Prism 7 (GraphPad Prism, GraphPad Software, La Jolla, CA) and  
6 R 3.6.1 (R Development Core Team). The packages of *rms*, *Hmisc*, *pROC*, *stats*, *PredictABEL*, and *rmda*  
7 were involved in this process.

## 8 **Results**

### 9 **Baseline characteristics and outcomes**

10 A total of 746 patients with AP were extracted from the database, of whom 4 patients were excluded due  
11 to loss to follow-up, thus resulting in 742 evaluable patients included in our study. The demographic and  
12 clinical characteristics of all patients are listed in [Table 1](#). The total cohort consisted of 291 women  
13 (39.218%) and 451 men (60.782%), with a female-to-male ratio of 0.645:1. The age ranged from 18 to  
14 89 years old and the average age was 52 years old. The median body mass index (BMI) was 28.430  
15 kg/m<sup>2</sup> (IQR: 24.750-32.870). The participants were of diverse racial and ethnic backgrounds, with 567  
16 Caucasians (76.415%), 54 African Americans (7.278%), 35 Hispanics (4.717%), 9 Native Americans  
17 (1.213%), 9 Asians (1.213%), and 61 Others (8.221%). About 505 patients were admitted to medical-  
18 surgical intensive care unit (Med-Surg ICU) (68.059%), 76 to medical intensive care unit (MICU)  
19 (10.243%), 65 to surgical intensive care unit (SICU) (8.760%), 96 to other ICUs (12.938%). Many  
20 patients have similar commodities, 340 of whom were complicated with hypertension (45.822%), 109

1 with diabetes mellitus (DM) (14.690%), 74 with chronic obstructive pulmonary diseases (COPD)  
2 (9.973%), 43 with chronic heart failure (CHF) (5.795%), 29 with stroke (3.908%), 28 with myocardial  
3 infarction (MI) (3.774%), 42 with renal insufficiency (RI) (5.660%), and others did not have prominent  
4 comorbidities (12.803%). Eventually, 39 patients underwent surgical treatment for AP (5.256%). We  
5 also analyzed the incidence of severe complications and found that respiratory failure requiring  
6 ventilation and renal failure requiring dialysis were 62 (8.356%) and 11 (1.482%) respectively. Finally,  
7 33 patients died in hospital and the mortality rate was 4.447%.

## 8 **Prognostic factors for in-hospital mortality**

9 Univariate logistic regression analysis was performed for each potential risk factor. Age, GCS score,  
10 MBP, albumin, lactate, bilirubin, BUN, WBC, calcium, AST, and comorbidities of CHF, COPD,  
11 hypertension were risk factors for in-hospital mortality determined by univariate logistic regression  
12 analysis ( $P < 0.1$ ). Thereafter, all these risk factors were entered simultaneously into the multivariable  
13 logistic regression analysis to control possible confounding factors. Finally, age, BUN, and lactate (ABL)  
14 were proved to be independent risk factors for predicting in-hospital mortality (Table 2). Due to  
15 incomplete data, 364 patients were excluded, leaving 378 evaluable patients included in the nomogram  
16 model ABL. The flow chart of the inclusion of eligible patients is shown in Fig. 1. The diagnostic  
17 equation built on multivariate logistic regression analysis is as follows:

$$18 \text{ Logit } P = -10.3074 + 0.0831 * \text{Age} + 0.4032 * \text{Lactate} + 0.0201 * \text{BUN}$$

19 **Fig. 1** Flow chart of patient selection.



## 1 **Development of a nomogram predicting in-hospital mortality**

2 Based on the multivariate logistic regression analysis, a nomogram was constructed by assigning a  
3 weighted point to each independent risk factor on the point scale (Fig. 2). A higher total point of all risk  
4 factors refers to a higher in-hospital mortality rate. For example, a patient who is 70 years old (71 points),  
5 with BUN of 20 mg/dL (6 points), lactate of 10 mmol/L (63 points) would score 140 points, which  
6 corresponds to an estimated 50% risk of in-hospital death.

7 **Fig. 2** Nomogram for predicting in-hospital mortality in AP. To obtain nomogram predicted in-hospital  
8 mortality, locate the value of each independent risk factor at each axis, draw a vertical line to the “Point”  
9 axis to get the point for each risk factor, then sum all the points, locate the sum on the “Total Points”  
10 axis to get the predicted probability on “Predicted in-hospital mortality” axis. AP, acute pancreatitis

## 11 **Performance of the nomogram model ABL**

12 The discrimination and calibration, two basic characteristics of model validation, were tested to evaluate  
13 the performance of the nomogram model ABL [33]. Model discrimination was assessed using the C-  
14 index that measures the ability to predict the outcomes. A higher C-index refers to a greater ability to  
15 discriminate the outcomes. The C-index of our nomogram model ABL was 0.896 (95%CI: 0.861 to  
16 0.925), showing a great discrimination ability. The receiver operating characteristic (ROC) curves of age,  
17 lactate, BUN, and the nomogram model ABL for predicting in-hospital mortality were shown in Fig. 3A.  
18 By visual inspection of AUROC, nomogram model ABL showed better performance than any other  
19 individual risk factor. Model calibration was evaluated using the Hosmer-Lemeshow Chi-square test and  
20 a calibration plot. The Hosmer-Lemeshow Chi-square which measured the calibration was 7.201 ( $P =$

1 0.515), demonstrating that there was no significant difference from a perfect fit. The calibration plot was  
2 shown in **Fig. 3B**. Visual inspection of the calibration plot further indicated good agreement between the  
3 predicted and actual in-hospital mortality.

4 **Fig. 3** (A) ROC curves for the nomogram model ABL and individual risk factors for predicting in-  
5 hospital mortality. AUROC represents the discrimination ability of a predictive model. (B) Calibration  
6 plot comparing the actual and predicted in-hospital mortality. The x-axis indicates the deciles of predicted  
7 in-hospital mortality. Each bar in the graph stands for the actual and predicted in-hospital mortality.  
8 ROC, receiver operating characteristic; AUROC, area under the receiver operator characteristic curve

## 9 **Validation of the nomogram model ABL**

10 The bootstrapping technique was employed to internally validate model performance [32]. During  
11 internal validation, nomogram model ABL retained its excellent discrimination in the bootstrap samples,  
12 showing an optimism corrected C-index of 0.892 (set seed 123). The calibration curve was used to assess  
13 the ability of a predictive model to obtain unbiased estimates of the outcome, and a perfectly calibrated  
14 predictive model would produce a curve on which the predicted and actual probabilities fall along a 45-  
15 degree diagonal line [34]. The calibration curve of nomogram model ABL was very close to the 45-  
16 degree ideal line, showing good agreement between the predicted and actual in-hospital mortality (**Fig.**  
17 **4**).

18 **Fig. 4** Calibration curve of nomogram model ABL. The x-axis represents the predicted in-hospital  
19 mortality calculated according to the model, while the y-axis exhibits the actual in-hospital mortality.  
20 The vertical lines show the frequency distribution of the predicted in-hospital mortality. The apparent  
21 calibration curve (dotted line) indicates the model performance in the original data, while the bias-

1 corrected curve (solid line) represents the model performance after correction for optimism using 1000  
2 bootstrapped resamples. Perfect prediction would fall on the 45-degree (dashed) reference line.

### 3 **Comparison of predictive accuracy for in-hospital mortality between** 4 **the nomogram model ABL and APACHE IV**

5 Complete APACHE IV data were available for 606 patients (81.167%), of whom 27 patients (4.455%)  
6 died in the hospital. The median APACHE IV was 46 in the survival group and 90 in the death group.  
7 The C-index was calculated to estimate the discrimination ability of APACHE IV [0.857 (95% CI: 0.826  
8 to 0.884)]. There was no statistically significant difference between the C-index of the nomogram model  
9 ABL and that of APACHE IV ( $P = 0.499$ ), indicating the nomogram model ABL had a similar predictive  
10 accuracy with APACHE IV. The ROC curves for the nomogram model ABL and APACHE IV also  
11 demonstrated comparable discriminating power (Fig. 5A).

12 The integrated discrimination improvement index (IDI) is a method to quantify the incremental  
13 predictive value of new methods to existing predictive models [35]. In this study, IDI was calculated to  
14 assess the improvement in risk stratification using different models. The IDI was 0.105 (95%CI: -0.016  
15 to 0.226), indicating no significant difference ( $P = 0.088$ ) in performance between the nomogram model  
16 ABL and APACHE IV.

17 The DCA can depict the overall net benefit of using predictive models compared with the treat-all-  
18 patients and treat-none scheme. Fig. 5B showed the net benefit of using the nomogram model ABL and  
19 APACHE IV, with several overlaps, the net benefit of the nomogram model ABL was comparable to  
20 that of APACHE IV.

21 **Fig. 5 (A)** ROC curves for the nomogram model ABL and APACHE IV. Visual comparison of ROC

1 curves indicates the discrimination performance of the nomogram model ABL was comparable to that  
2 of APACHE IV. (B) Decision curve analysis for the nomogram model ABL and the APACHE IV. The  
3 y-axis measures the net benefit, and the x-axis shows the threshold probability. The horizontal black  
4 line along the x-axis represents the assumption that no patient will die in the hospital (i.e., no patient  
5 should undergo close monitoring and aggressive treatment), whereas the solid gray line represents the  
6 assumption that all patients will die in the hospital (i.e., all patients should undergo close monitoring  
7 and aggressive treatment). The red line indicates the nomogram model ABL and the blue line  
8 represents the APACHE IV. ROC, receiver operating characteristic; APACHE, Acute Physiology,  
9 Age, and Chronic Health Evaluation

## 10 Discussion

11 AP is a heterogeneous digestive system disease. Most patients with AP will relieve spontaneously  
12 without any organ failure, while about 20% of cases will evolve into severe form, which is associated  
13 with MODS, sepsis, and high mortality [6]. Thus, it is imperative to identify patients who might develop  
14 severe AP and initiate more aggressive intervention [26]. Through early identification and reasonable  
15 treatment, patients at high risk of mortality might be converted to low risk, which is the main goal of our  
16 model development.

17 Using demographic, clinical and conventional laboratory data from a large-scale publicly available ICU  
18 database, the following independent risk factors for predicting in-hospital mortality of AP were identified:  
19 age, BUN, and lactate (ABL). These factors are consistent with the risk factors traditionally associated  
20 with in-hospital mortality. Except for age, other risk factors are modifiable by timely and aggressive  
21 treatment, which is particularly important for improving outcomes. Nomograms could provide predictive

1  
2  
3  
4 1 information tailored to the individual, by establishing a simple graphical representation of a complex  
5  
6 2 statistical prediction model [34]. Currently, nomograms are increasingly being used to improve clinical  
7  
8  
9 3 decision making. In this study, we incorporated age, BUN and lactate into an easy-to-use and reliable  
10  
11 4 nomogram model ABL. Our predictive model also generates an equation on a continuous scale rather  
12  
13  
14 5 than an arbitrary “cutoff” for each parameter. The outstanding advantage of the nomogram model ABL  
15  
16  
17 6 is its simplicity and accuracy. There are only three parameters in the current model, which requires no  
18  
19  
20 7 extra calculations and is convenient for clinicians. In addition, all these parameters are objective and can  
21  
22  
23 8 be easily obtained following a general hospital admission. We calculated the C-index to quantify the  
24  
25  
26 9 discriminatory power of our model. A C-index of 1 represents perfect prediction accuracy, whereas a C-  
27  
28  
29 10 index of 0.5 indicates no better than random guesses. With a C-index of 0.896, the nomogram model  
30  
31  
32 11 ABL exhibited perfect model discrimination performance. The ROC curve also showed that the  
33  
34  
35 12 nomogram model ABL provide great model prediction accuracy. Internal validation via bootstrap  
36  
37  
38 13 resamples demonstrated an adjusted C-index of 0.892, which was in excellent agreement with the original  
39  
40  
41 14 data. Moreover, the calibration curve indicated a sufficient fit of predicted and actual in-hospital mortality.  
42  
43  
44 15 This user-friendly nomogram model ABL might be a valuable tool for clinical practice because it could  
45  
46  
47 16 provide a simple and accurate way to predict in-hospital mortality in patients with AP.  
48  
49  
50 17 As is well known to all, age is an important and useful indicator of poor prognosis in various entities.  
51  
52  
53 18 Furthermore, many acknowledged predictive models have incorporated age for predicting the severity or  
54  
55  
56 19 mortality of AP in the field of clinical medicine [7, 14]. Our study also demonstrates that age is an  
57  
58  
59 20 independent risk factor for in-hospital mortality in patients with AP. With age incremented by 10 years,  
60  
21 the risk for in-hospital mortality was increased by 6.776% in our study.  
22 In this study, we found that hyperlactatemia ( $\geq 2$ mmol/L) were very common in AP (50.131%). Lactate,

1 a byproduct of glycolysis under anaerobic conditions, is generally considered as a powerful indicator of  
2 ischemia and hypoxia in body tissues. However, diseases with elevated plasma catecholamine, such as  
3 huge trauma or shock, can also lead to exaggerated glycolysis and increased lactate level [36-38].  
4 Hyperlactatemia in AP might be related to the above factors. Single plasma lactate level, especially that  
5 measured immediately after admission to the ICU or arrival at the emergency room, is regarded as a  
6 powerful predictor of subsequent multiorgan failure and mortality. In 1965, Peretz et al. [39] first  
7 described the relationship between plasma lactate level and mortality and revealed a death rate of 100%  
8 when the plasma lactate level is higher than 13.3 mmol/L. More recently, Nichol et al. [40] and Haas et  
9 al. [41] also found that the mortality rate of patients with a plasma lactate level greater than 10 mmol/L  
10 was up to 80%. Recent studies demonstrated that early lactate clearance and continuous dynamic  
11 monitoring of the plasma lactate level could serve as a useful prognostic factor and guide timely  
12 intervention of critically ill patients [41-46]. In 2017, Valverde-López et al. [47] reported that elevated  
13 plasma lactate level was closely related to persistent multiorgan failure of patients with AP, lactate might  
14 become a useful biomarker for predicting poor clinical outcomes of AP on admission, especially for the  
15 prediction of mortality, lactate exhibited an excellent AUROC of 0.870. Moreover, lactate performed  
16 much better than CRP in predicting ICU requirements and mortality [47]. Our research demonstrated  
17 that the lactate level was strongly associated with in-hospital mortality of AP, with a great AUROC of  
18 0.776. By multivariate logistic regression analysis, lactate has been proven to be an independent risk  
19 factor for predicting in-hospital mortality, which is consistent with previous studies [47].  
20 BUN as a useful predictor of in-hospital mortality is consistent with the current existing literature.  
21 Previous studies have shown that BUN on admission and BUN rise in the first 24 hours following  
22 admission can predict mortality of patients with AP [29, 48-51]. Many studies believe that increased

1  
2  
3  
4 1 BUN in AP is owing to the loss of body fluid, the decrease of intravascular blood volume, and the  
5  
6 2 development of prerenal azotemia [48, 50]. If the hypovolemic state cannot be corrected completely at  
7  
8  
9 3 early stage, the patients will suffer from further depletion of effective circulatory blood volume, from  
10  
11 4 severe decrease in glomerular filtration fraction and eventually leading to prerenal insufficiency. If the  
12  
13  
14 5 disease progresses further, it may lead to multiple organ and system failure, which is the main cause of  
15  
16  
17 6 death [10, 28]. Therefore, many scoring systems used in clinical practice are based on the urea level  
18  
19  
20 7 (Ranson, Glasgow, POP, BISAP) [7, 52-54]. The Hong Kong criterion is based on only two parameters,  
21  
22 8 the urea, and glycemia [55].

23  
24  
25 9 In order to further evaluate the value of nomogram model ABL in clinical use, we compared its  
26  
27 10 performance with the APACHE scoring system. APACHE II is one of the most powerful and widely  
28  
29  
30 11 used prognostic tool for all ICU patients to predict severity and mortality. Later this scoring system was  
31  
32  
33 12 extrapolated to AP, the study results showing perfect prognostic value [15, 56]. The APACHE II had  
34  
35  
36 13 been modified many times since its launch in 1985, and the latest version was the APACHE IV published  
37  
38 14 in 2006 [57, 58]. Involving about 52 different physiologic indexes, APACHE IV accounts for  
39  
40  
41 15 hepatobiliary parameters, sedation status, and multiple comorbidities simultaneously. Due to such wide  
42  
43 16 range of physiologic variables, APACHE IV has a much better performance compared with APACHE II  
44  
45  
46 17 [59, 60]. In 2015, a study reported that an APACHE IV of 44 or higher would predict mortality in 100%  
47  
48  
49 18 of cases, and the AUROC for APACHE IV was 0.93 [61]. However, the main drawback of APACHE IV  
50  
51  
52 19 is that it relies on many variables that are not routinely collected during general hospital admission [7].  
53  
54 20 Nevertheless, our nomogram model ABL could attain a comparable predictive accuracy of the more  
55  
56 21 complex APACHE IV with fewer parameters in patients with AP.

57  
58 22 An ideal predictive model should be reliable and easy-to-use at the early stage of the disease, using  
59  
60

1 readily available data [62]. The nomogram model ABL achieves many of these characteristics: it is  
2 generated from data within 24 hours after admission, using age and some easily obtainable, reliable, and  
3 inexpensive clinical and laboratory parameters in a model, and is feasible in a user-friendly manner.  
4 Moreover, the nomogram model ABL presents an excellent prognostic ability for in-hospital mortality,  
5 which is comparable to that of APACHE IV.  
6 Our study still has some limitations. First, this study included patients with AP from one database, which  
7 may caution us from generalizing this nomogram model ABL to a larger population. Second, although  
8 we tried to adjust confounding factors as much as possible by performing multivariate logistic regression  
9 analysis, residual confounding factors through unknown or unmeasured covariates might not be  
10 completely ruled out. Finally, the database that we used did not cover information on etiology, initial or  
11 recurrent episodes of pancreatitis, which might affect in-hospital mortality.

## 12 **Conclusion**

13 We propose a refined nomogram model ABL with age, easily obtainable clinical and biochemical  
14 parameters, the BUN and lactate. This nomogram model ABL shows excellent performance and allows  
15 clinical practitioners to perform early and quick risk-stratification and guide early management strategies  
16 for AP patients.

## 17 **Abbreviations**

18 AP: acute pancreatitis; eICU-CRD: eICU Collaborative Research Database; C-index: concordance index;  
19 ICU: intensive care unit; CI: confidence interval; MODS: multiple organ dysfunction syndromes; CTSI:  
20 computed tomography severity index; TRIPOD: Transparent Reporting of a multivariable prediction



1 model for Individual Prognosis Or Diagnosis; BT: body temperature; HR: heart rate; MBP: mean blood  
2 pressure; RR: respiratory rate; GCS: Glasgow Coma Scale; BE: base excess; BUN: blood urea nitrogen;  
3 WBC: white blood cell; PLT: platelet; LDH: lactic dehydrogenase; AST: aspartate aminotransferase;  
4 PaO<sub>2</sub>: arterial oxygen pressure; SD: standard deviation; OR: odds ratio; AUROC: area under the receiver  
5 operator characteristic curve; BMI: body mass index; IQR: interquartile range; Med-Surg ICU: medical-  
6 surgical intensive care unit; MICU: medical intensive care unit; SICU: surgical intensive care unit; DM:  
7 diabetes mellitus; COPD: chronic obstructive pulmonary diseases; CHF: chronic heart failure; MI:  
8 myocardial infarction; RI: renal insufficiency; ROC: receiver operating characteristic; IDI: integrated  
9 discrimination improvement index; APACHE: Acute Physiology, Age and Chronic Health Evaluation.

## 10 **Declarations**

11 **Conflicts of interest:** The authors declare that they have no conflict of interest.

12 **Acknowledgments:** Not applicable.

13 **Funding:** There is no funding.

14 **Availability of data and material:** The data were available on the eICU-CRD website at

15 <https://eicu-crd.mit.edu/>.

16 **Authors' contributions:** Caifeng Li conceived the idea, extracted the data, performed the analysis, and  
17 drafted the manuscript. Guolin Wang helped to frame the idea of the study, interpret the results and revise  
18 the manuscript. Qian Ren helped to edit pictures and revised the manuscript. All authors read and  
19 approved the final manuscript.

20 **Ethics approval and consent to participate:** The study was an analysis of a third-party anonymized  
21 publicly available database with pre-existing institutional review board approval.

1 **Consent for publication:** Not applicable.

## 2 REFERENCE

- 3 1. Lee PJ, Papachristou GI, (2019) New insights into acute pancreatitis. *Nature reviews*
- 4 *Gastroenterology & hepatology* 16: 479-496
- 5 2. Nassar TI, Qunibi WY, (2019) AKI Associated with Acute Pancreatitis. *Clinical journal of the*
- 6 *American Society of Nephrology : CJASN* 14: 1106-1115
- 7 3. Pavlidis P, Crichton S, Lemmich Smith J, Morrison D, Atkinson S, Wyncoll D, Ostermann M,
- 8 (2013) Improved outcome of severe acute pancreatitis in the intensive care unit. *Critical care*
- 9 *research and practice* 2013: 897107
- 10 4. Banks PA, Freeman ML, (2006) Practice guidelines in acute pancreatitis. *The American journal*
- 11 *of gastroenterology* 101: 2379-2400
- 12 5. Pieńkowska J, Gwoździejewicz K, Skrobisz-Balandowska K, Marek I, Kostro J, Szurowska E,
- 13 Studniarek M, (2016) Perfusion-CT--Can We Predict Acute Pancreatitis Outcome within the
- 14 *First 24 Hours from the Onset of Symptoms?* *PloS one* 11: e0146965
- 15 6. Whitcomb DC, (2006) Clinical practice. Acute pancreatitis. *The New England journal of*
- 16 *medicine* 354: 2142-2150
- 17 7. Wu BU, Johannes RS, Sun X, Tabak Y, Conwell DL, Banks PA, (2008) The early prediction
- 18 *of mortality in acute pancreatitis: a large population-based study.* *Gut* 57: 1698-1703
- 19 8. Ponette J, Wilmer A, (2001) Update on the management of acute severe pancreatitis. *Acta*
- 20 *clinica Belgica* 56: 135-145
- 21 9. Mutinga M, Rosenbluth A, Tenner SM, Odze RR, Sica GT, Banks PA, (2000) Does mortality
- 22 *occur early or late in acute pancreatitis?* *International journal of pancreatology : official journal*
- 23 *of the International Association of Pancreatology* 28: 91-95
- 24 10. Gloor B, Müller CA, Worni M, Martignoni ME, Uhl W, Büchler MW, (2001) Late mortality in
- 25 *patients with severe acute pancreatitis.* *The British journal of surgery* 88: 975-979
- 26 11. Lowham A, Lavelle J, Leese T, (1999) Mortality from acute pancreatitis. *International journal*
- 27 *of pancreatology : official journal of the International Association of Pancreatology* 25: 103-
- 28 106
- 29 12. Forsmark CE, Baillie J, (2007) AGA Institute technical review on acute pancreatitis.
- 30 *Gastroenterology* 132: 2022-2044
- 31 13. Srinivasan G, Venkatakrisnan L, Sambandam S, Singh G, Kaur M, Janarthan K, John BJ,
- 32 (2016) Current concepts in the management of acute pancreatitis. *Journal of family medicine*
- 33 *and primary care* 5: 752-758
- 34 14. Di MY, Liu H, Yang ZY, Bonis PA, Tang JL, Lau J, (2016) Prediction Models of Mortality in
- 35 *Acute Pancreatitis in Adults: A Systematic Review.* *Annals of internal medicine* 165: 482-490
- 36 15. Larvin M, McMahon MJ, (1989) APACHE-II score for assessment and monitoring of acute
- 37 *pancreatitis.* *Lancet (London, England)* 2: 201-205
- 38 16. Kumaravel A, Stevens T, Papachristou GI, Muddana V, Bhatt A, Lee PJ, Holmes J, Lopez R,
- 39 Whitcomb DC, Parsi MA, (2015) A Model to Predict the Severity of Acute Pancreatitis Based

- 1  
2  
3  
4  
5  
6  
7  
8  
9  
10  
11  
12  
13  
14  
15  
16  
17  
18  
19  
20  
21  
22  
23  
24  
25  
26  
27  
28  
29  
30  
31  
32  
33  
34  
35  
36  
37  
38  
39  
40  
41  
42  
43  
44  
45  
46  
47  
48  
49  
50  
51  
52  
53  
54  
55  
56  
57  
58  
59  
60
- 1 on Serum Level of Amylase and Body Mass Index. *Clinical gastroenterology and hepatology* :  
2 the official clinical practice journal of the American Gastroenterological Association 13: 1496-  
3 1501
- 4 17. Chauhan S, Forsmark CE, (2010) The difficulty in predicting outcome in acute pancreatitis. *The*  
5 *American journal of gastroenterology* 105: 443-445
- 6 18. Gao W, Yang HX, Ma CE, (2015) The Value of BISAP Score for Predicting Mortality and  
7 Severity in Acute Pancreatitis: A Systematic Review and Meta-Analysis. *PloS one* 10:  
8 e0130412
- 9 19. Yang YX, Li L, (2016) Evaluating the Ability of the Bedside Index for Severity of Acute  
10 Pancreatitis Score to Predict Severe Acute Pancreatitis: A Meta-Analysis. *Medical principles*  
11 *and practice* : international journal of the Kuwait University, Health Science Centre 25: 137-  
12 142
- 13 20. Yang CJ, Chen J, Phillips AR, Windsor JA, Petrov MS, (2014) Predictors of severe and critical  
14 acute pancreatitis: a systematic review. *Digestive and liver disease : official journal of the Italian*  
15 *Society of Gastroenterology and the Italian Association for the Study of the Liver* 46: 446-451
- 16 21. Balthazar EJ, Robinson DL, Megibow AJ, Ranson JH, (1990) Acute pancreatitis: value of CT  
17 in establishing prognosis. *Radiology* 174: 331-336
- 18 22. Bollen TL, Singh VK, Maurer R, Repas K, van Es HW, Banks PA, Mortele KJ, (2012) A  
19 comparative evaluation of radiologic and clinical scoring systems in the early prediction of  
20 severity in acute pancreatitis. *The American journal of gastroenterology* 107: 612-619
- 21 23. Spanier BW, Nio Y, van der Hulst RW, Tuynman HA, Dijkgraaf MG, Bruno MJ, (2010)  
22 Practice and yield of early CT scan in acute pancreatitis: a Dutch Observational Multicenter  
23 Study. *Pancreatology : official journal of the International Association of Pancreatology (IAP)*  
24 [et al] 10: 222-228
- 25 24. Pollard TJ, Johnson AEW, Raffa JD, Celi LA, Mark RG, Badawi O, (2018) The eICU  
26 Collaborative Research Database, a freely available multi-center database for critical care  
27 research. *Scientific data* 5: 180178
- 28 25. Collins GS, Reitsma JB, Altman DG, Moons KG, (2015) Transparent reporting of a  
29 multivariable prediction model for individual prognosis or diagnosis (TRIPOD): the TRIPOD  
30 Statement. *BMC medicine* 13: 1
- 31 26. Tenner S, Baillie J, DeWitt J, Vege SS, (2013) American College of Gastroenterology guideline:  
32 management of acute pancreatitis. *The American journal of gastroenterology* 108: 1400-1415;  
33 1416
- 34 27. Jiang X, Su Z, Wang Y, Deng Y, Zhao W, Jiang K, Sun C, (2019) Prognostic nomogram for  
35 acute pancreatitis patients: An analysis of publicly electronic healthcare records in intensive  
36 care unit. *Journal of critical care* 50: 213-220
- 37 28. Al Mofleh IA, (2008) Severe acute pancreatitis: pathogenetic aspects and prognostic factors.  
38 *World journal of gastroenterology* 14: 675-684
- 39 29. Wu BU, (2011) Prognosis in acute pancreatitis. *CMAJ : Canadian Medical Association journal*  
40 = *journal de l'Association medicale canadienne* 183: 673-677
- 41 30. Hosmer DW, Hosmer T, Le Cessie S, Lemeshow S, (1997) A comparison of goodness-of-fit  
42 tests for the logistic regression model. *Statistics in medicine* 16: 965-980
- 43 31. DeLong ER, DeLong DM, Clarke-Pearson DL, (1988) Comparing the areas under two or more

- 1 correlated receiver operating characteristic curves: a nonparametric approach. *Biometrics* 44:  
2 837-845
- 3 32. Steyerberg EW, Harrell FE, Jr., Borsboom GJ, Eijkemans MJ, Vergouwe Y, Habbema JD,  
4 (2001) Internal validation of predictive models: efficiency of some procedures for logistic  
5 regression analysis. *Journal of clinical epidemiology* 54: 774-781
- 6 33. Royston P, Altman DG, (2013) External validation of a Cox prognostic model: principles and  
7 methods. *BMC medical research methodology* 13: 33
- 8 34. Iasonos A, Schrag D, Raj GV, Panageas KS, (2008) How to build and interpret a nomogram for  
9 cancer prognosis. *Journal of clinical oncology : official journal of the American Society of  
10 Clinical Oncology* 26: 1364-1370
- 11 35. van Smeden M, Moons KGM, (2017) Event rate net reclassification index and the integrated  
12 discrimination improvement for studying incremental value of risk markers. *Statistics in  
13 medicine* 36: 4495-4497
- 14 36. Renew JR, Barbara DW, Hyder JA, Dearani JA, Rivera M, Pulido JN, (2016) Frequency and  
15 outcomes of severe hyperlactatemia after elective cardiac surgery. *The Journal of thoracic and  
16 cardiovascular surgery* 151: 825-830
- 17 37. Raper RF, Cameron G, Walker D, Bowey CJ, (1997) Type B lactic acidosis following  
18 cardiopulmonary bypass. *Critical care medicine* 25: 46-51
- 19 38. Totaro RJ, Raper RF, (1997) Epinephrine-induced lactic acidosis following cardiopulmonary  
20 bypass. *Critical care medicine* 25: 1693-1699
- 21 39. Peretz DI, Scott HM, Duff J, Dossetor JB, MacLean LD, McGregor M, (1965) The significance  
22 of lacticacidemia in the shock syndrome. *Annals of the New York Academy of Sciences* 119:  
23 1133-1141
- 24 40. Nichol AD, Egi M, Pettila V, Bellomo R, French C, Hart G, Davies A, Stachowski E, Reade  
25 MC, Bailey M, Cooper DJ, (2010) Relative hyperlactatemia and hospital mortality in critically  
26 ill patients: a retrospective multi-centre study. *Critical care (London, England)* 14: R25
- 27 41. Haas SA, Lange T, Saugel B, Petzoldt M, Fuhrmann V, Metschke M, Kluge S, (2016) Severe  
28 hyperlactatemia, lactate clearance and mortality in unselected critically ill patients. *Intensive  
29 care medicine* 42: 202-210
- 30 42. Nguyen HB, Rivers EP, Knoblich BP, Jacobsen G, Muzzin A, Ressler JA, Tomlanovich MC,  
31 (2004) Early lactate clearance is associated with improved outcome in severe sepsis and septic  
32 shock. *Critical care medicine* 32: 1637-1642
- 33 43. Arnold RC, Shapiro NI, Jones AE, Schorr C, Pope J, Casner E, Parrillo JE, Dellinger RP,  
34 Trzeciak S, (2009) Multicenter study of early lactate clearance as a determinant of survival in  
35 patients with presumed sepsis. *Shock (Augusta, Ga)* 32: 35-39
- 36 44. Vincent JL, Quintairois ESA, Couto L, Jr., Taccone FS, (2016) The value of blood lactate  
37 kinetics in critically ill patients: a systematic review. *Critical care (London, England)* 20: 257
- 38 45. Varis E, Pettilä V, Poukkanen M, Jakob SM, Karlsson S, Perner A, Takala J, Wilkman E, (2017)  
39 Evolution of Blood Lactate and 90-Day Mortality in Septic Shock. A Post Hoc Analysis of the  
40 FINNAKI Study. *Shock (Augusta, Ga)* 47: 574-581
- 41 46. Zhang Z, Xu X, (2014) Lactate clearance is a useful biomarker for the prediction of all-cause  
42 mortality in critically ill patients: a systematic review and meta-analysis\*. *Critical care medicine*  
43 42: 2118-2125

- 1 47. Valverde-López F, Matas-Cobos AM, Alegría-Motte C, Jiménez-Rosales R, Úbeda-Muñoz M,  
2 Redondo-Cerezo E, (2017) BISAP, RANSON, lactate and others biomarkers in prediction of  
3 severe acute pancreatitis in a European cohort. *Journal of gastroenterology and hepatology* 32:  
4 1649-1656
- 5 48. Jordanov P, Grigorov G, (2012) Predictors of mortality in acute pancreatitis: a retrospective  
6 study
- 7 49. Wu BU, Bakker OJ, Papachristou GI, Besselink MG, Repas K, van Santvoort HC, Muddana V,  
8 Singh VK, Whitcomb DC, Gooszen HG, Banks PA, (2011) Blood urea nitrogen in the early  
9 assessment of acute pancreatitis: an international validation study. *Archives of internal medicine*  
10 171: 669-676
- 11 50. Wu BU, Johannes RS, Sun X, Conwell DL, Banks PA, (2009) Early changes in blood urea  
12 nitrogen predict mortality in acute pancreatitis. *Gastroenterology* 137: 129-135
- 13 51. Lin S, Hong W, Basharat Z, Wang Q, Pan J, Zhou M, (2017) Blood Urea Nitrogen as a Predictor  
14 of Severe Acute Pancreatitis Based on the Revised Atlanta Criteria: Timing of Measurement  
15 and Cutoff Points. *Canadian journal of gastroenterology & hepatology* 2017: 9592831
- 16 52. Ranson JH, Pasternack BS, (1977) Statistical methods for quantifying the severity of clinical  
17 acute pancreatitis. *The Journal of surgical research* 22: 79-91
- 18 53. Blamey SL, Imrie CW, O'Neill J, Gilmour WH, Carter DC, (1984) Prognostic factors in acute  
19 pancreatitis. *Gut* 25: 1340-1346
- 20 54. Harrison DA, D'Amico G, Singer M, (2007) The Pancreatitis Outcome Prediction (POP) Score:  
21 a new prognostic index for patients with severe acute pancreatitis. *Critical care medicine* 35:  
22 1703-1708
- 23 55. Fan ST, Lai EC, Mok FP, Lo CM, Zheng SS, Wong J, (1993) Prediction of the severity of acute  
24 pancreatitis. *American journal of surgery* 166: 262-268; discussion 269
- 25 56. Yeung YP, Lam BY, Yip AW, (2006) APACHE system is better than Ranson system in the  
26 prediction of severity of acute pancreatitis. *Hepatobiliary & pancreatic diseases international* :  
27 HBPD INT 5: 294-299
- 28 57. Zimmerman JE, Wagner DP, Draper EA, Wright L, Alzola C, Knaus WA, (1998) Evaluation  
29 of acute physiology and chronic health evaluation III predictions of hospital mortality in an  
30 independent database. *Critical care medicine* 26: 1317-1326
- 31 58. Zimmerman JE, Kramer AA, McNair DS, Malila FM, (2006) Acute Physiology and Chronic  
32 Health Evaluation (APACHE) IV: hospital mortality assessment for today's critically ill patients.  
33 *Critical care medicine* 34: 1297-1310
- 34 59. Zimmerman JE, Kramer AA, (2008) Outcome prediction in critical care: the Acute Physiology  
35 and Chronic Health Evaluation models. *Current opinion in critical care* 14: 491-497
- 36 60. Shrope-Mok SR, Propst KA, Iyengar R, (2010) APACHE IV versus PPI for predicting  
37 community hospital ICU mortality. *The American journal of hospice & palliative care* 27: 243-  
38 247
- 39 61. Mok SR, Mohan S, Elfant AB, Judge TA, (2015) The Acute Physiology and Chronic Health  
40 Evaluation IV, a New Scoring System for Predicting Mortality and Complications of Severe  
41 Acute Pancreatitis. *Pancreas* 44: 1314-1319
- 42 62. Vogenberg FR, (2009) Predictive and prognostic models: implications for healthcare decision-  
43 making in a modern recession. *American health & drug benefits* 2: 218-222

1

2 Table 1 Characteristics and outcomes of participants

| Characteristics              | Survived to Discharge<br>(N=709) | Died in the Hospital<br>(N = 33) | P Value |
|------------------------------|----------------------------------|----------------------------------|---------|
| <b>Demographics</b>          |                                  |                                  |         |
| Age (median [IQR])           | 51.00 [40.00, 63.00]             | 65.00 [60.00, 78.00]             | <0.001  |
| Gender male, n (%)           | 427 (60.2)                       | 24 (72.7)                        | 0.209   |
| Ethnicity, n (%)             |                                  |                                  | 0.348   |
| African American             | 49 (7.0)                         | 5 (15.2)                         |         |
| Asian                        | 9 (1.3)                          | 0 (0.0)                          |         |
| Caucasian                    | 542 (77.2)                       | 25 (75.8)                        |         |
| Hispanic                     | 34 (4.8)                         | 1 (3.0)                          |         |
| Native American              | 8 (1.1)                          | 1 (3.0)                          |         |
| Other/Unknown                | 60 (8.5)                         | 1 (3.0)                          |         |
| Height (cm, median [IQR])    | 172.00 [163.00, 178.00]          | 172.70 [165.10, 178.43]          | 0.685   |
| Weight (kg, median [IQR])    | 83.90 [70.90, 98.10]             | 93.30 [78.97, 103.50]            | 0.037   |
| <b>Clinical Factors</b>      |                                  |                                  |         |
| ICU type, n (%)              |                                  |                                  | 0.002   |
| Med-Surg ICU                 | 485 (68.4)                       | 20 (60.6)                        |         |
| MICU                         | 76 (10.7)                        | 0 (0.0)                          |         |
| SICU                         | 55 (7.8)                         | 10 (30.3)                        |         |
| Other ICUs                   | 93(13.1)                         | 3(9.1)                           |         |
| Comorbidities, n (%)         |                                  |                                  |         |
| CHF                          | 37 (5.3)                         | 6 (18.2)                         | 0.007   |
| COPD                         | 67 (9.6)                         | 7 (21.2)                         | 0.062   |
| Hypertension                 | 317 (45.4)                       | 23 (69.7)                        | 0.01    |
| DM                           | 105 (15.0)                       | 4 (12.1)                         | 0.836   |
| MI                           | 26 (3.7)                         | 2 (6.1)                          | 0.825   |
| RI                           | 38 (5.4)                         | 4 (12.1)                         | 0.218   |
| Vital signs                  |                                  |                                  |         |
| BT (°C, median [IQR])        | 36.70 [36.40, 36.90]             | 36.60 [36.40, 36.82]             | 0.509   |
| RR (/min, median [IQR])      | 30.00 [12.00, 37.00]             | 33.00 [27.00, 39.00]             | 0.113   |
| HR (/min, median [IQR])      | 118.00 [102.00, 134.00]          | 120.00 [100.00, 135.00]          | 0.908   |
| MBP (mm Hg, median [IQR])    | 98.00 [60.00, 125.50]            | 51.00 [43.00, 70.00]             | <0.001  |
| APACHE IV (median [IQR])     | 46.00 [34.00, 62.00]             | 90.00 [71.00, 105.00]            | <0.001  |
| GCS (median [IQR])           | 15.00 [14.00, 15.00]             | 13.00 [10.00, 15.00]             | <0.001  |
| Invasive intervention, n (%) |                                  |                                  |         |
| Operation                    | 36 (5.1)                         | 3 (9.1)                          | 0.541   |
| Intubation                   | 34 (5.2)                         | 7 (24.1)                         | <0.001  |
| Ventilation                  | 53 (8.1)                         | 9 (31.0)                         | <0.001  |
| Dialysis                     | 9 (1.4)                          | 2 (6.9)                          | 0.12    |
| <b>Laboratory Data</b>       |                                  |                                  |         |

|                                       |                          |                          |        |
|---------------------------------------|--------------------------|--------------------------|--------|
| Albumin (g/dL, median [IQR])          | 2.90 [2.40, 3.40]        | 2.40 [1.95, 2.80]        | <0.001 |
| Lactate (mmol/L, median [IQR])        | 1.90 [1.20, 3.10]        | 5.20 [2.20, 8.57]        | <0.001 |
| BE (mEq/L, median [IQR])              | -3.20 [-7.00, 0.50]      | -5.10 [-9.20, -3.00]     | 0.245  |
| Total bilirubin (mg/dL, median [IQR]) | 1.00 [0.60, 2.30]        | 2.10 [0.80, 3.90]        | 0.105  |
| Glucose (mg/dL, median [IQR])         | 167.00 [128.00, 237.75]  | 194.00 [162.00, 247.00]  | 0.065  |
| BUN (mg/dL, median [IQR])             | 18.00 [12.00, 31.00]     | 37.00 [23.00, 54.00]     | <0.001 |
| WBC ( $\times 10^9/L$ , median [IQR]) | 10.80 [7.37, 15.70]      | 14.00 [7.85, 23.70]      | 0.106  |
| Hematocrit (% , median [IQR])         | 34.90 [30.50, 39.88]     | 33.00 [29.08, 37.18]     | 0.272  |
| PLT (% , median [IQR])                | 178.50 [126.00, 241.00]  | 172.00 [118.00, 236.00]  | 0.634  |
| Calcium (mg/dL, median [IQR])         | 7.80 [7.20, 8.30]        | 7.45 [6.50, 8.20]        | 0.129  |
| LDH (Units/L, median [IQR])           | 350.00 [236.00, 557.50]  | 469.50 [317.25, 634.50]  | 0.439  |
| AST (Units/L, median [IQR])           | 67.00 [32.00, 160.25]    | 110.00 [39.00, 301.50]   | 0.052  |
| Cholesterol (mg/dL, median [IQR])     | 191.00 [127.50, 296.00]  | 137.00 [137.00, 137.00]  | 0.466  |
| Triglycerides (mg/dL, median [IQR])   | 188.00 [105.75, 1083.75] | 189.00 [151.00, 374.00]  | 0.946  |
| Amylase (Units/L, median [IQR])       | 362.00 [112.00, 949.00]  | 581.60 [102.75, 1091.25] | 0.8    |
| Lipase (Units/L, median [IQR])        | 952.00 [364.00, 2995.00] | 1538.00 [75.50, 4323.50] | 0.887  |
| PaO <sub>2</sub> (mmHg, median [IQR]) | 75.75 [67.00, 93.50]     | 98.50 [74.75, 101.75]    | 0.24   |

1 *Abbreviations:* IQR interquartile range, ICU intensive care unit, Med-Surg ICU medical-surgical intensive care unit, MICU medical  
2 intensive care unit, SICU surgical intensive care unit, CHF chronic heart failure, COPD chronic obstructive pulmonary diseases,  
3 DM diabetes mellitus, MI myocardial infarction, RI renal insufficiency, BT body temperature, RR respiratory rate, HR heart rate,  
4 MBP mean blood pressure, APACHE Acute Physiology, Age and Chronic Health Evaluation, GCS Glasgow Coma Scale, BE base  
5 excess, BUN blood urea nitrogen, WBC white blood cell, PLT platelet, LDH lactic dehydrogenase, AST aspartate aminotransferase,  
6 PaO<sub>2</sub> arterial oxygen pressure.

7

8

9

10

11

12

13

14

15

16



1

2

Table 2. Univariate and multivariate logistic regression analysis with stepwise variable selection

|                         | Univariate analysis |               |         | Multivariate analysis |                |         |
|-------------------------|---------------------|---------------|---------|-----------------------|----------------|---------|
|                         | OR                  | 95%CI         | P Value | OR                    | 95%CI          | P Value |
| <b>Demographics</b>     |                     |               |         |                       |                |         |
| Age                     | 1.0538              | 1.0305-1.0792 | 0       | 1.0798                | 1.0174-1.16    | 0.0201  |
| Gender                  | 1.7611              | 0.8345-4.0548 | 0.1554  |                       |                |         |
| BMI                     | 1.0321              | 0.986-1.0756  | 0.1526  |                       |                |         |
| <b>Clinical Factors</b> |                     |               |         |                       |                |         |
| Comorbidities           |                     |               |         |                       |                |         |
| CHF                     | 3.976               | 1.415-9.66    | 0.0042  | 5.2176                | 0.6046-45.9861 | 0.1257  |
| COPD                    | 2.5396              | 0.9855-5.7822 | 0.0361  | 0.8789                | 0.1098-6.4035  | 0.8993  |
| Hypertension            | 2.7716              | 1.335-6.1756  | 0.0083  | 2.2653                | 0.5367-11.4279 | 0.2842  |
| DM                      | 0.7803              | 0.228-2.0334  | 0.6482  |                       |                |         |
| MI                      | 1.67                | 0.2617-5.9465 | 0.4978  |                       |                |         |
| RI                      | 2.3993              | 0.686-6.4923  | 0.1173  |                       |                |         |
| Vital signs             |                     |               |         |                       |                |         |
| BT                      | 0.9811              | 0.7461-1.4972 | 0.9175  |                       |                |         |
| RR                      | 1.0227              | 0.9959-1.0512 | 0.1018  |                       |                |         |
| HR                      | 0.9988              | 0.9867-1.0118 | 0.8491  |                       |                |         |
| MBP                     | 0.9797              | 0.9661-0.9914 | 0.0017  | 0.9909                | 0.9715-1.0072  | 0.3028  |
| GCS                     | 0.9178              | 0.8682-0.9755 | 0.0035  | 0.991                 | 0.8342-1.2101  | 0.9228  |
| <b>Laboratory Data</b>  |                     |               |         |                       |                |         |
| Albumin                 | 0.3357              | 0.1911-0.5761 | 0.0001  | 0.4189                | 0.108-1.5017   | 0.1882  |
| Lactate                 | 1.3811              | 1.2217-1.5719 | 0       | 1.6353                | 1.2683-2.2129  | 0.0004  |
| BE                      | 0.9559              | 0.8919-1.0274 | 0.2069  |                       |                |         |
| Total bilirubin         | 1.08                | 0.9749-1.174  | 0.0915  | 0.8698                | 0.629-1.0969   | 0.3193  |
| Glucose                 | 1.0009              | 0.9983-1.003  | 0.4174  |                       |                |         |
| BUN                     | 1.0245              | 1.0138-1.035  | 0       | 1.0278                | 1.0037-1.0523  | 0.0186  |
| WBC                     | 1.0501              | 1.0067-1.0913 | 0.0164  | 0.9748                | 0.9054-1.0448  | 0.4721  |
| Hematocrit              | 0.9724              | 0.9198-1.0259 | 0.3144  |                       |                |         |
| PLT                     | 0.9983              | 0.9942-1.0018 | 0.3698  |                       |                |         |
| Calcium                 | 0.7605              | 0.5565-1.0501 | 0.0916  | 0.9943                | 0.4857-2.1647  | 0.9878  |
| LDH                     | 0.9998              | 0.9971-1.0014 | 0.8382  |                       |                |         |
| AST                     | 1.0002              | 0.9999-1.0005 | 0.0946  | 0.9997                | 0.9987-1.0005  | 0.5251  |
| Cholesterol             | 0.9889              | 0.9421-1.0035 | 0.5197  |                       |                |         |
| Triglycerides           | 0.9996              | 0.9984-1.0001 | 0.2623  |                       |                |         |
| Amylase                 | 1                   | 0.9994-1.0004 | 0.8752  |                       |                |         |
| Lipase                  | 1                   | 0.9998-1.0002 | 0.796   |                       |                |         |
| PaO2                    | 1.0003              | 0.9824-1.0125 | 0.9619  |                       |                |         |

3

Abbreviations: AP acute pancreatitis, OR odds ratio, CI confidence interval, CHF chronic heart failure, COPD chronic obstructive pulmonary diseases, DM diabetes mellitus, MI myocardial infarction, RI renal insufficiency, BT body temperature, RR respiratory

4



1  
2  
3  
4  
5  
6  
7  
8  
9  
10  
11  
12  
13  
14  
15  
16  
17  
18  
19  
20  
21  
22  
23  
24  
25  
26  
27  
28  
29  
30  
31  
32  
33  
34  
35  
36  
37  
38  
39  
40  
41  
42  
43  
44  
45  
46  
47  
48  
49  
50  
51  
52  
53  
54  
55  
56  
57  
58  
59  
60

1 rate, HR heart rate, MBP mean blood pressure, GCS Glasgow Coma Scale, BE base excess, BUN blood urea nitrogen, WBC white  
2 blood cell, PLT platelet, LDH lactic dehydrogenase, AST aspartate aminotransferase, PaO2 arterial oxygen pressure.

For peer review only

1 746 patients with acute pancreatitis admitted  
2 to ICU from eICU database

3  
4  
5  
6 4 patients excluded due  
7 to loss of follow-up  
8  
9

10  
11  
12 742 patients were included for clinical  
13 characteristics analysis and risk factor selection  
14  
15  
16  
17

18  
19  
20  
21 364 patients with  
22 incomplete data excluded  
23  
24  
25

26  
27  
28 378 eligible patients for nomogram  
29 development and useful evaluation  
30  
31  
32

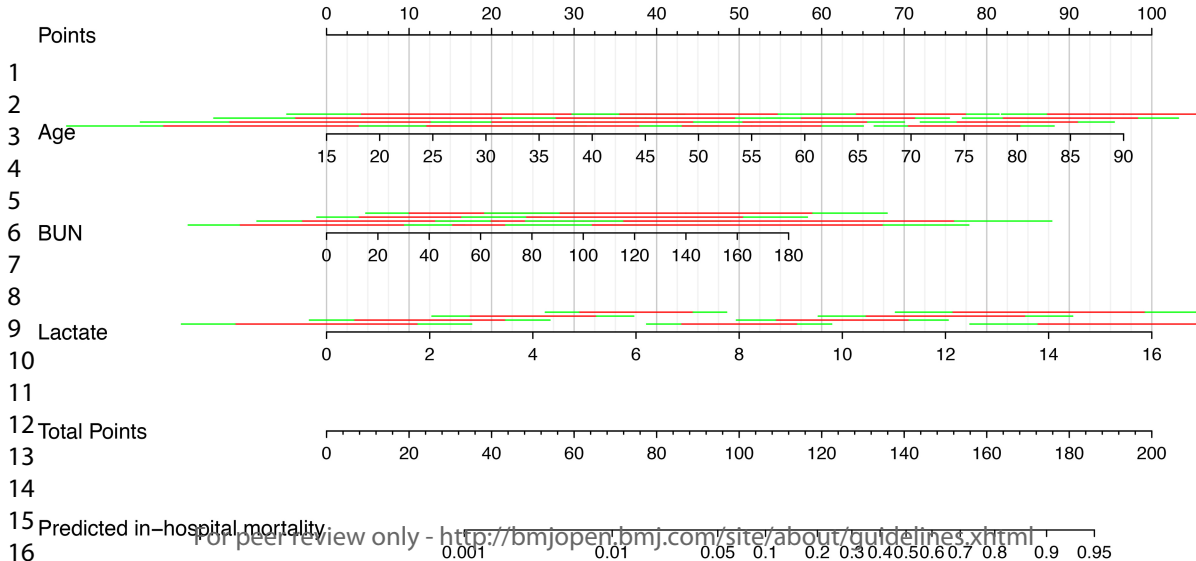

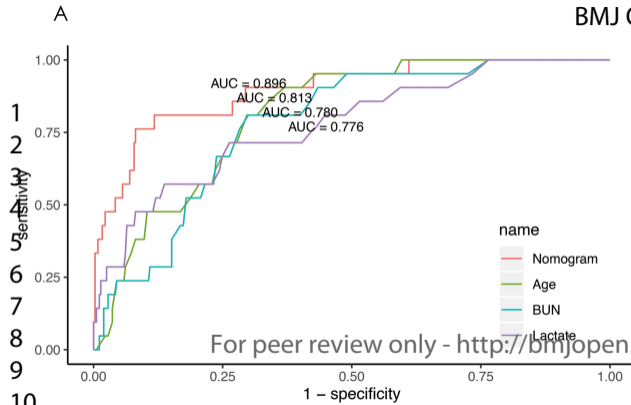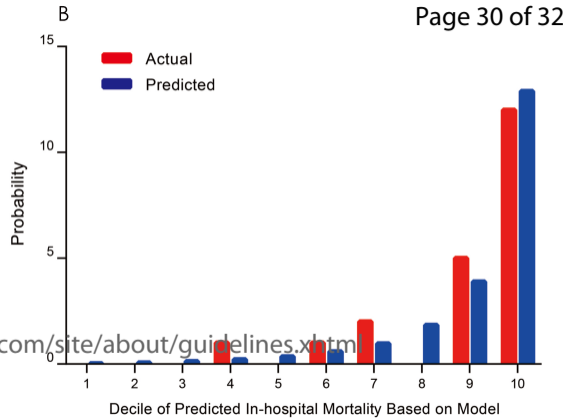

For peer review only - <http://bmjopen.bmj.com/site/about/guidelines.xhtml>

1  
2  
3  
4  
5  
6  
7  
8  
9  
10  
11  
12  
13  
14  
15  
16  
17  
18  
19

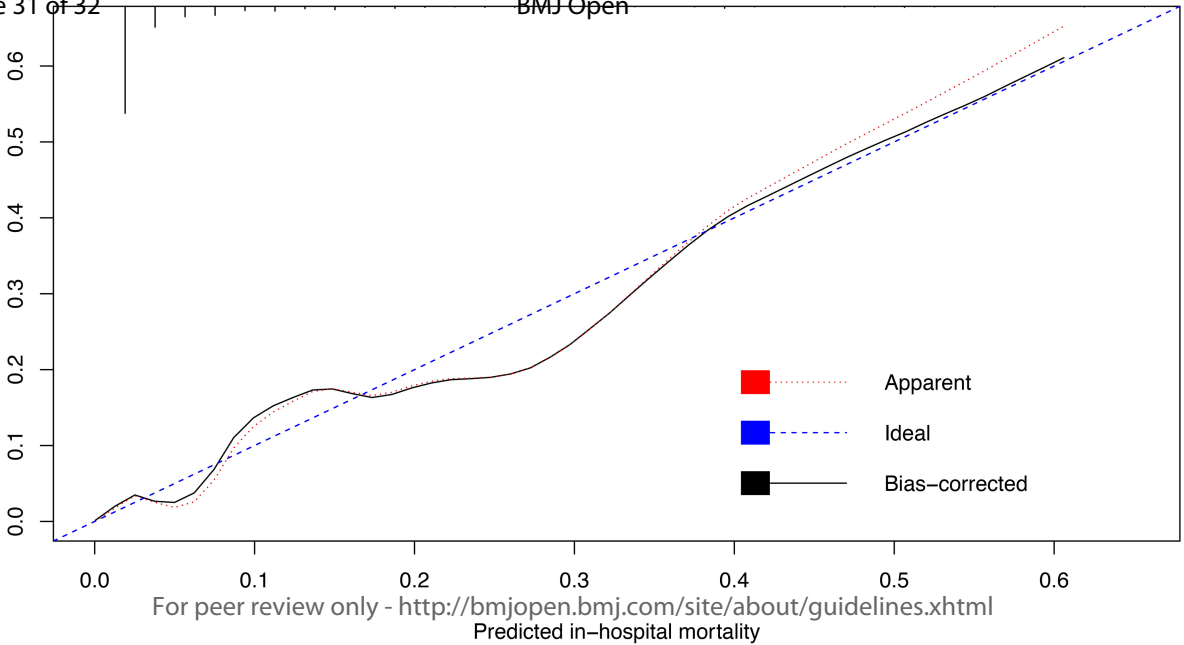

For peer review only - <http://bmjopen.bmj.com/site/about/guidelines.xhtml>

B= 1000 repetitions, boot

Mean absolute error=0.01 n=378

A

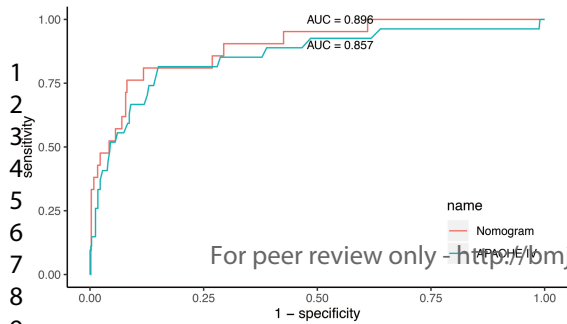

BMJ Open

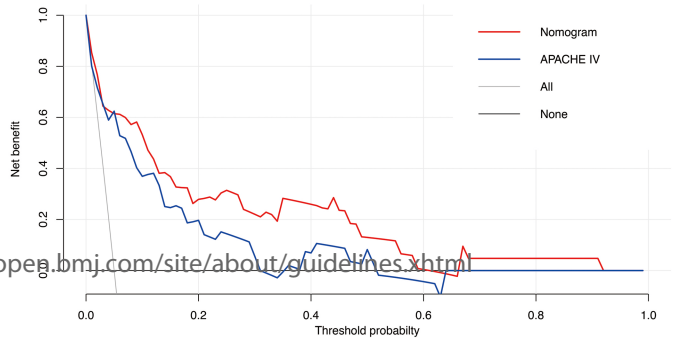

For peer review only - <http://bmjopen.bmj.com/site/about/guidelines.xhtml>

1  
2  
3  
4  
5  
6  
7  
8  
9

## TRIPOD Checklist: Prediction Model Development and Validation

| Section/Topic                | Item |     | Checklist Item                                                                                                                                                                                        | Page           |
|------------------------------|------|-----|-------------------------------------------------------------------------------------------------------------------------------------------------------------------------------------------------------|----------------|
| <b>Title and abstract</b>    |      |     |                                                                                                                                                                                                       |                |
| Title                        | 1    | D;V | Identify the study as developing and/or validating a multivariable prediction model, the target population, and the outcome to be predicted.                                                          | 1              |
| Abstract                     | 2    | D;V | Provide a summary of objectives, study design, setting, participants, sample size, predictors, outcome, statistical analysis, results, and conclusions.                                               | 2-3            |
| <b>Introduction</b>          |      |     |                                                                                                                                                                                                       |                |
| Background and objectives    | 3a   | D;V | Explain the medical context (including whether diagnostic or prognostic) and rationale for developing or validating the multivariable prediction model, including references to existing models.      | 3-4            |
|                              | 3b   | D;V | Specify the objectives, including whether the study describes the development or validation of the model or both.                                                                                     | 4              |
| <b>Methods</b>               |      |     |                                                                                                                                                                                                       |                |
| Source of data               | 4a   | D;V | Describe the study design or source of data (e.g., randomized trial, cohort, or registry data), separately for the development and validation data sets, if applicable.                               | 5-6            |
|                              | 4b   | D;V | Specify the key study dates, including start of accrual; end of accrual; and, if applicable, end of follow-up.                                                                                        | 5-6            |
| Participants                 | 5a   | D;V | Specify key elements of the study setting (e.g., primary care, secondary care, general population) including number and location of centres.                                                          | 5-6            |
|                              | 5b   | D;V | Describe eligibility criteria for participants.                                                                                                                                                       | 5-6            |
|                              | 5c   | D;V | Give details of treatments received, if relevant.                                                                                                                                                     | Not Applicable |
| Outcome                      | 6a   | D;V | Clearly define the outcome that is predicted by the prediction model, including how and when assessed.                                                                                                | 4              |
|                              | 6b   | D;V | Report any actions to blind assessment of the outcome to be predicted.                                                                                                                                | Not Applicable |
| Predictors                   | 7a   | D;V | Clearly define all predictors used in developing or validating the multivariable prediction model, including how and when they were measured.                                                         | 6              |
|                              | 7b   | D;V | Report any actions to blind assessment of predictors for the outcome and other predictors.                                                                                                            | Not applicable |
| Sample size                  | 8    | D;V | Explain how the study size was arrived at.                                                                                                                                                            | 8              |
| Missing data                 | 9    | D;V | Describe how missing data were handled (e.g., complete-case analysis, single imputation, multiple imputation) with details of any imputation method.                                                  | 9              |
| Statistical analysis methods | 10a  | D   | Describe how predictors were handled in the analyses.                                                                                                                                                 | 6-7            |
|                              | 10b  | D   | Specify type of model, all model-building procedures (including any predictor selection), and method for internal validation.                                                                         | 7              |
|                              | 10c  | V   | For validation, describe how the predictions were calculated.                                                                                                                                         | 7              |
|                              | 10d  | D;V | Specify all measures used to assess model performance and, if relevant, to compare multiple models.                                                                                                   | 7              |
|                              | 10e  | V   | Describe any model updating (e.g., recalibration) arising from the validation, if done.                                                                                                               | Not applicable |
| Risk groups                  | 11   | D;V | Provide details on how risk groups were created, if done.                                                                                                                                             | Not applicable |
| Development vs. validation   | 12   | V   | For validation, identify any differences from the development data in setting, eligibility criteria, outcome, and predictors.                                                                         | Not applicable |
| <b>Results</b>               |      |     |                                                                                                                                                                                                       |                |
| Participants                 | 13a  | D;V | Describe the flow of participants through the study, including the number of participants with and without the outcome and, if applicable, a summary of the follow-up time. A diagram may be helpful. | 8-9            |
|                              | 13b  | D;V | Describe the characteristics of the participants (basic demographics, clinical features, available predictors), including the number of participants with missing data for predictors and outcome.    | 8-9            |
|                              | 13c  | V   | For validation, show a comparison with the development data of the distribution of important variables (demographics, predictors and outcome).                                                        | Not applicable |
| Model development            | 14a  | D   | Specify the number of participants and outcome events in each analysis.                                                                                                                               | 9              |
|                              | 14b  | D   | If done, report the unadjusted association between each candidate predictor and outcome.                                                                                                              | 9              |
| Model specification          | 15a  | D   | Present the full prediction model to allow predictions for individuals (i.e., all regression coefficients, and model intercept or baseline survival at a given time point).                           | 9              |
|                              | 15b  | D   | Explain how to use the prediction model.                                                                                                                                                              | 9-10           |
| Model performance            | 16   | D;V | Report performance measures (with CIs) for the prediction model.                                                                                                                                      | 10-13          |
| Model-updating               | 17   | V   | If done, report the results from any model updating (i.e., model specification, model performance).                                                                                                   | Not applicable |
| <b>Discussion</b>            |      |     |                                                                                                                                                                                                       |                |
| Limitations                  | 18   | D;V | Discuss any limitations of the study (such as nonrepresentative sample, few events per predictor, missing data).                                                                                      | 16-17          |
| Interpretation               | 19a  | V   | For validation, discuss the results with reference to performance in the development data, and any other validation data.                                                                             | 13-14          |
|                              | 19b  | D;V | Give an overall interpretation of the results, considering objectives, limitations, results from similar studies, and other relevant evidence.                                                        | 13-16          |
| Implications                 | 20   | D;V | Discuss the potential clinical use of the model and implications for future research.                                                                                                                 | 16             |
| <b>Other information</b>     |      |     |                                                                                                                                                                                                       |                |
| Supplementary information    | 21   | D;V | Provide information about the availability of supplementary resources, such as study protocol, Web calculator, and data sets.                                                                         | Not applicable |
| Funding                      | 22   | D;V | Give the source of funding and the role of the funders for the present study.                                                                                                                         | Not applicable |

\*Items relevant only to the development of a prediction model are denoted by D, items relating solely to a validation of a prediction model are denoted by V, and items relating to both are denoted D;V. We recommend using the TRIPOD Checklist in conjunction with the TRIPOD Explanation and Elaboration document.

# BMJ Open

## Early prediction of in-hospital mortality in acute pancreatitis: A retrospective observational cohort study based on a large multicentre critical care database

|                                 |                                                                                                                                                                                                                                                                                                                                         |
|---------------------------------|-----------------------------------------------------------------------------------------------------------------------------------------------------------------------------------------------------------------------------------------------------------------------------------------------------------------------------------------|
| Journal:                        | <i>BMJ Open</i>                                                                                                                                                                                                                                                                                                                         |
| Manuscript ID                   | bmjopen-2020-041893.R1                                                                                                                                                                                                                                                                                                                  |
| Article Type:                   | Original research                                                                                                                                                                                                                                                                                                                       |
| Date Submitted by the Author:   | 13-Sep-2020                                                                                                                                                                                                                                                                                                                             |
| Complete List of Authors:       | li, caifeng; Tianjin Medical University General Hospital, Department of critical medicine<br>Ren, Qian; Tianjin Daily, Advertising center<br>Wang, Zhiqiang; Tianjin Medical University General Hospital, Department of critical medicine<br>wang, guolin; Tianjin Medical University General Hospital, Department of critical medicine |
| <b>Primary Subject Heading</b>: | Intensive care                                                                                                                                                                                                                                                                                                                          |
| Secondary Subject Heading:      | Gastroenterology and hepatology                                                                                                                                                                                                                                                                                                         |
| Keywords:                       | Pancreatic disease < GASTROENTEROLOGY, Adult intensive & critical care < INTENSIVE & CRITICAL CARE, Gastroenterology < INTERNAL MEDICINE                                                                                                                                                                                                |
|                                 |                                                                                                                                                                                                                                                                                                                                         |

SCHOLARONE™  
Manuscripts





I, the Submitting Author has the right to grant and does grant on behalf of all authors of the Work (as defined in the below author licence), an exclusive licence and/or a non-exclusive licence for contributions from authors who are: i) UK Crown employees; ii) where BMJ has agreed a CC-BY licence shall apply, and/or iii) in accordance with the terms applicable for US Federal Government officers or employees acting as part of their official duties; on a worldwide, perpetual, irrevocable, royalty-free basis to BMJ Publishing Group Ltd ("BMJ") its licensees and where the relevant Journal is co-owned by BMJ to the co-owners of the Journal, to publish the Work in this journal and any other BMJ products and to exploit all rights, as set out in our [licence](#).

The Submitting Author accepts and understands that any supply made under these terms is made by BMJ to the Submitting Author unless you are acting as an employee on behalf of your employer or a postgraduate student of an affiliated institution which is paying any applicable article publishing charge ("APC") for Open Access articles. Where the Submitting Author wishes to make the Work available on an Open Access basis (and intends to pay the relevant APC), the terms of reuse of such Open Access shall be governed by a Creative Commons licence – details of these licences and which [Creative Commons](#) licence will apply to this Work are set out in our licence referred to above.

Other than as permitted in any relevant BMJ Author's Self Archiving Policies, I confirm this Work has not been accepted for publication elsewhere, is not being considered for publication elsewhere and does not duplicate material already published. I confirm all authors consent to publication of this Work and authorise the granting of this licence.

1  
2  
3  
4  
5  
6  
7  
8  
9  
10  
11  
12  
13  
14  
15  
16  
17  
18  
19  
20  
21  
22  
23  
24  
25  
26  
27  
28  
29  
30  
31  
32  
33  
34  
35  
36  
37  
38  
39  
40  
41  
42  
43  
44  
45  
46  
47  
48  
49  
50  
51  
52  
53  
54  
55  
56  
57  
58  
59  
60

# 1 **Early prediction of in-hospital** 2 **mortality in acute pancreatitis: A** 3 **retrospective observational cohort study based on a large** 4 **multicentre critical care database**

5 Caifeng Li<sup>1</sup>¶, Qian Ren<sup>2</sup>, Zhiqiang Wang<sup>1</sup>, Guolin Wang<sup>1\*</sup>

6 <sup>1</sup> Department of critical medicine, Tianjin Medical University General Hospital, Tianjin, China

7 <sup>2</sup>Advertising Center, Tianjin Daily, Tianjin, China

8 ¶ First author: Caifeng Li, E-mail: [lcftianyineifenmi@163.com](mailto:lcftianyineifenmi@163.com), Address: NO.154, Anshan Road, Heping  
9 District, Tianjin, China

10 \* Corresponding author: Guolin Wang, E-mail: [wgl202@qq.com](mailto:wgl202@qq.com), Address: NO.154, Anshan Road,  
11 Heping District, Tianjin, China

## 1 Abstract

2 **Objective:** To develop and validate a prediction model for predicting in-hospital mortality in patients  
3 with acute pancreatitis (AP).

4 **Design:** A retrospective observational cohort study based on a large multicentre critical care database.

5 **Setting:** All subject data were collected from the eICU Collaborative Research Database (eICU-CRD),  
6 which covers 200,859 ICU admissions of 139,367 patients in 208 US hospitals between 2014 and 2015.

7 **Participants:** A total of 746 patients with AP were drawn from eICU-CRD. Due to loss to follow-up  
8 (4 patients) or incomplete data (364 patients), 378 patients were enrolled in the primary cohort to  
9 establish a nomogram model and conduct internal validation.

10 **Primary and secondary outcome measures:** The outcome of the prediction model was in-  
11 hospital mortality. All risk factors found significant in the univariate analysis were considered for  
12 multivariate analysis to adjust for confounding factors. Then a nomogram model was established. The  
13 performance of the nomogram model was evaluated by the concordance index (C-index) and the  
14 calibration plot. The nomogram model was internally validated using the bootstrap resampling method.  
15 The predictive accuracy of the nomogram model was compared with that of Acute Physiology, Age, and  
16 Chronic Health Evaluation (APACHE) IV. Decision curve analysis (DCA) was performed to evaluate  
17 and compare the potential net benefit using of different predictive models.

18 **Results:** The overall in-hospital mortality rate is 4.447%. Age, BUN, and lactate (ABL) were the  
19 independent risk factors determined by multivariate analysis. The C-index of nomogram model ABL  
20 [0.896 (95% confidence interval [CI]: 0.825 to 0.967)] was similar to that of APACHE IV ( $P = 0.086$ ),  
21 showing a comparable discriminating power. Calibration plot demonstrated good agreement between the

1 predicted and actual in-hospital mortality. DCA showed that the nomogram model ABL was clinically  
2 useful.

3 **Conclusions:** Nomogram model ABL, which used readily available data, exhibited high predictive  
4 value for predicting in-hospital mortality in AP.

## 5 **Strengths and limitations of this study**

6 This is an original research to develop and internally validate a user-friendly prediction model using  
7 easily obtainable clinical and laboratory parameters.

8 The nomogram model ABL presents an excellent prognostic ability for predicting in-hospital mortality  
9 in AP patients.

10 The retrospective observational cohort study design could lead to certain types of bias (e.g., confounding  
11 bias, selection bias).

12 The suitability of the model in larger population needs further external validation, due to the small sample  
13 size and small number of events.

## 14 **Background**

15 AP is a relatively common, but poorly understood, inflammatory disease of the exocrine pancreas. So  
16 far, the detailed pathogenesis of AP still remains unclear and no specific and effective treatment has been  
17 proposed yet [1]. The clinical manifestation and disease course of AP also vary dramatically from self-  
18 limiting simple edema pancreatitis to severe acute necrotizing pancreatitis characterized by systemic  
19 inflammatory response syndrome and multiple organ failure [2]. With a mortality rate of less than 5%,  
20 the mild edematous AP runs a benign course and recovers spontaneously without any sequelae in about

1 70% - 80% of patients, while nearly 20% - 30% of patients will develop severe necrotic pancreatitis with  
2 a high mortality rate up to 20% - 30% [3-9].

3 Two peaks of mortality have been noted in patients with severe AP. Early death usually occurs in the  
4 first two weeks owing to multiple organ dysfunction syndromes (MODS) caused by the production and  
5 release of diverse cytokines [9-11]. Late death generally happens two weeks later as a result of  
6 peripancreatic necrosis, infection, and secondary MODS [9, 10]. Studies found that patients in the high-  
7 risk group may benefit from closer monitoring, early aggressive fluid resuscitation, rational use of  
8 antibiotics, and timely invasive strategies, such as endoscopic sphincterotomy and radiologic  
9 intervention [12, 13]. Once diagnosed as AP, early identification of high-risk patients is therefore  
10 essential to improve survival.

11 Since the first scoring system for AP severity was proposed in 1974, about 20 different predictive models  
12 have been developed [14]. However, there are some practical problems that restrict wide clinical  
13 application of these predictive models. For instance, based on more than 10 parameters, APACHE II is  
14 cumbersome and complex for rapid assessment within 24 hours after admission [15, 16]. Moreover,  
15 APACHE II is a generic scoring system for all critical patients, so some parameters may be irrelevant to  
16 the prognosis of AP [17]. Developed as an easy-to-use risk stratification tool, the BISAP score  
17 outperforms other predictive models in specificity, but showing a suboptimal sensitivity in evaluating  
18 the severity of AP [18, 19]. Despite its high sensitivity, RANSON score is less operative because it takes  
19 at least 48 hours to be completed, resulting in a delay of triage and management [16, 20]. The computed  
20 tomography severity index (CTSI) requires high-cost and radioactive CT scans, which might be  
21 unavailable for most patients at their first visit [16, 21]. In addition, pancreatic necrosis might be  
22 undetectable by an early CT scan within 24 hours [22]. Even in the first 3-4 days, contrast-enhanced CT

1 scan seems unreliable in estimating the extent of pancreatic necrosis [22, 23].

2 In view of the shortcomings of these currently available predictive models, there is consequently an  
3 urgent need for an easy-to-use and accurate prognostic tool for predicting in-hospital mortality in AP  
4 patients. Therefore, we collected demographics, clinical factors, laboratory data from a freely available,  
5 multi-center database eICU-CRD and explored the risk factor for in-hospital mortality. Furthermore, we  
6 incorporated these independent prognostic factors and developed a nomogram model in patients with AP  
7 for better clinical guidance.

## 8 **Patients and methods**

### 9 **Study design**

10 We extracted subject data from eICU-CRD, a large multicentre critical care database. The database is  
11 publicly and freely accessible to researchers, according to data usage agreement by the review board of  
12 PhysioNet (Our record ID: 33047414). The eICU-CRD covers 200,859 ICU admissions of 139,367  
13 patients in 208 US hospitals between 2014 and 2015. All data were stored automatically and retrieved  
14 electronically through the Philips Healthcare eICU program. It includes records of demographics,  
15 physiological indexes from bedside monitors, diagnosis via International Classification of Diseases, 9th  
16 Edition, Clinical Modification (ICD-9-CM) codes, and other laboratory data obtained during routine  
17 medical care. All data were de-identified by the eICU program and anonymous to researchers before  
18 analysis [24]. As this research was a retrospective observational cohort study based on data from eICU-  
19 CRD, no ethical approval was required from our local ethics committee. This study was reported  
20 following the recommendations of the Transparent Reporting of a multivariable prediction model for

1 Individual Prognosis Or Diagnosis (TRIPOD) statement [25].

## 2 **Participants**

3 The study population was drawn from eICU-CRD. According to the 2012 Atlanta Criteria, the diagnosis  
4 of AP can be made if two or more of the following criteria are present: (1) abdominal pain (acute and  
5 persistent epigastric pain usually radiating to the back); (2) serum amylase or lipase level being at least  
6 3 times greater than the normal upper limit; (3) characteristic abdominal imaging findings of AP [26].

7 The ICD-9-CM diagnostic code used for selecting patients with AP is 577.0.

## 8 **Data retrieval**

9 All subject data within the first 24 hours after admission were collected from eICU-CRD using the  
10 Structure Query Language. The physiological variables, including body temperature (BT), heart rate  
11 (HR), mean blood pressure (MBP), and respiratory rate (RR) were obtained from the table *apacheApsVar*.  
12 The baseline characteristics such as age, gender, weight, height, APACHE IV, Glasgow Coma Scale  
13 (GCS) score, and the history of past illnesses were collected from the tables of *patient*,  
14 *apachePatientResult* and *pastHistory*. The laboratory indexes, for instance, serum albumin, lactate, base  
15 excess (BE), total bilirubin, glucose, blood urea nitrogen (BUN), white blood cell (WBC), hematocrit,  
16 platelet (PLT), calcium, lactic dehydrogenase (LDH), aspartate aminotransferase (AST), cholesterol,  
17 triglycerides, amylase, lipase, and arterial oxygen pressure (PaO<sub>2</sub>) were extracted from the table *lab*.  
18 Potential risk factors associated with in-hospital mortality were identified from previous predictive  
19 models [16, 27], from literature or guidelines [7, 14, 28, 29], and from consulting clinic medical experts.  
20 The decisions of their inclusion in the univariate logistic regression analysis were based on the following

1 criteria that the potential risk factors: (1) were objective parameters, (2) were routinely measured in  
2 medical practice, and (3) were completely recorded or missing randomly in the dataset. The worst value  
3 of each variable recorded during the first 24 hours after admission was used to analyze and establish the  
4 nomogram model.

## 5 **Statistical analysis**

6 Continuous variables, expressed as mean with standard deviation (SD) or median with interquartile range  
7 (IQR), were analyzed using the Student t-test (for data with normal distribution) or Mann–Whitney U  
8 test (for data without normal distribution). Categorical variables, expressed as absolute numbers (n) and  
9 proportions (%), were compared using the Chi-square test or Fisher's exact test. Univariate logistic  
10 regression analysis was performed to determine the possible correlation between in-hospital mortality  
11 and potential risk factors. All significant risk factors ( $P < 0.1$ ) in the univariate logistic regression analysis  
12 were eligible for inclusion in the multivariate logistic regression analysis to adjust for confounding  
13 factors. Based on the results of the multivariate logistic regression analysis, a nomogram was constructed.  
14 The performance of the nomogram model was assessed using its calibration and discrimination.  
15 Calibration describes the level of agreement between predicted and actual risks, and is usually evaluated  
16 by calibration plot and Hosmer-Lemeshow Chi-square test [30]. Discrimination refers to the ability of a  
17 model to distinguish high-risk and low-risk patients, and is generally evaluated by C-index or area under  
18 the receiver operator characteristic curve (AUROC) [31]. In order to address overfitting and quantify  
19 optimism, the predictive model was internally validated using bootstrap resampling. Optimism represents  
20 the difference between the apparent (unadjusted) model performance and bootstrap (bias) corrected  
21 estimated model performance. Internal validation involved refitting the model to a series of 1000 random



1 samples drawn from the original dataset with replacement, and produced an overall C-index from all  
2 samples. This process adjusted the C-index for overoptimism which may arise when a model was  
3 validated with the same dataset used to build the model [32]. DCA was performed to evaluate the clinical  
4 usefulness of the nomogram model by quantifying the net benefits under different threshold probabilities.  
5 For all analyses, *P* value less than 0.05 was considered to be statistically significant. All statistical  
6 analyses were carried out on GraphPad Prism 7 (GraphPad Prism, GraphPad Software, La Jolla, CA) and  
7 R 3.6.1 (R Development Core Team). The packages of *rms*, *Hmisc*, *pROC*, *stats*, *PredictABEL*, and *rmda*  
8 were involved in this process.

## 9 **Results**

### 10 **Baseline characteristics and outcomes**

11 A total of 746 patients with AP were extracted from the database, of whom 4 patients were excluded due  
12 to loss to follow-up, thus resulting in 742 evaluable patients included in our study. Thirty-three patients  
13 died during hospitalization with in-hospital mortality rate of 4.447%. The demographic and clinical  
14 characteristics of all patients are listed in Table 1.

### 15 **Prognostic factors for in-hospital mortality**

16 Univariate logistic regression analysis was performed for each potential risk factor. Age, GCS score,  
17 MBP, albumin, lactate, bilirubin, BUN, WBC, calcium, AST, and comorbidities of CHF, COPD,  
18 hypertension were risk factors for in-hospital mortality determined by univariate logistic regression  
19 analysis ( $P < 0.1$ ). Thereafter, all these risk factors were entered simultaneously into the multivariable

1 logistic regression analysis to control possible confounding factors. Finally, age, BUN, and lactate (ABL)  
2 were proved to be independent risk factors for predicting in-hospital mortality (Table 2). Due to  
3 incomplete data, 364 patients were excluded, leaving 378 evaluable patients included in the nomogram  
4 model ABL. The flow chart of the inclusion of eligible patients is shown in Fig. 1. The characteristic  
5 features of patients included and excluded from the development of the nomogram is demonstrated in  
6 Table S. The diagnostic equation built on multivariate logistic regression analysis is as follows:

$$\text{Logit P} = -10.3074 + 0.0831 * \text{Age} + 0.4032 * \text{Lactate} + 0.0201 * \text{BUN}$$

## 8 **Development of a nomogram predicting in-hospital mortality**

9 Based on the multivariate logistic regression analysis, a nomogram was constructed by assigning a  
10 weighted point to each independent risk factor on the point scale (Fig. 2). A higher total point of all risk  
11 factors refers to a higher in-hospital mortality rate.

## 12 **Performance of the nomogram model ABL**

13 The discrimination and calibration, two basic characteristics of model validation, were tested to evaluate  
14 the performance of the nomogram model ABL [33]. Model discrimination was assessed using the C-  
15 index that measures the ability to predict the outcomes. A higher C-index refers to a greater ability to  
16 discriminate the outcomes. The C-index of our nomogram model ABL was 0.896 (95%CI: 0.825 to  
17 0.967), showing a great discrimination ability. The receiver operating characteristic (ROC) curves of age,  
18 lactate, BUN, and the nomogram model ABL for predicting in-hospital mortality were shown in Fig. 3A.  
19 By visual inspection of AUROC, nomogram model ABL showed better performance than any other  
20 individual risk factor. Model calibration was evaluated using the Hosmer-Lemeshow Chi-square test and

1  
2  
3  
4 1 a calibration plot. The Hosmer-Lemeshow Chi-square which measured the calibration was 7.201 ( $P =$   
5  
6 2 0.515), demonstrating that there was no significant difference from a perfect fit. The calibration plot was  
7  
8  
9 3 shown in Fig. 3B. Visual inspection of the calibration plot further indicated good agreement between the  
10  
11  
12 4 predicted and actual in-hospital mortality.

### 5 **Validation of the nomogram model ABL**

6 The bootstrapping technique was employed to internally validate model performance [32]. During  
7  
8 7 internal validation (set seed 123), nomogram model ABL retained its excellent discrimination in the  
9  
10 8 bootstrap samples, showing an optimism corrected C-index of 0.892 (95%CI: 0.822 to 0.962). The  
11  
12 9 calibration curve was used to assess the ability of a predictive model to obtain unbiased estimates of the  
13  
14 10 outcome, and a perfectly calibrated predictive model would produce a curve on which the predicted and  
15  
16 11 actual probabilities fall along a 45-degree diagonal line [34]. The calibration curve of nomogram model  
17  
18 12 ABL was very close to the 45-degree ideal line, showing good agreement between the predicted and  
19  
20 13 actual in-hospital mortality (Fig. 4).

### 14 **Comparison of predictive accuracy for in-hospital mortality between** 15 **the nomogram model ABL and APACHE IV**

16 Complete age, BUN, lactate and APACHE IV data were available for 334 patients , of whom 21 patients  
17  
18 17 died in the hospital. The median APACHE IV was 50 in the survival group and 91 in the death group.  
19  
20 18 The C-index was calculated to estimate the discrimination ability of APACHE IV [0.837 (95% CI: 0.730  
21  
22 19 to 0.944)]. There was no statistically significant difference between the C-index of the nomogram model  
23  
24 20 ABL and that of APACHE IV ( $P = 0.086$ ), indicating the nomogram model ABL had a similar predictive

1 accuracy with APACHE IV. The ROC curves for the nomogram model ABL and APACHE IV also  
2 demonstrated comparable discriminating power (Fig. 5A).

3 The integrated discrimination improvement index (IDI) is a method to quantify the incremental  
4 predictive value of new methods to existing predictive models [35]. In this study, IDI was calculated to  
5 assess the improvement in risk stratification using different models. The IDI was 0.105 (95%CI: -0.016  
6 to 0.226), indicating no significant difference ( $P = 0.088$ ) in performance between the nomogram model  
7 ABL and APACHE IV.

8 The DCA can depict the overall net benefit of using predictive models compared with the treat-all-  
9 patients and treat-none scheme. Fig. 5B showed the net benefit of using the nomogram model ABL and  
10 APACHE IV, with several overlaps, the net benefit of the nomogram model ABL was comparable to  
11 that of APACHE IV.

## 12 Discussion

13 AP is a heterogeneous digestive system disease. Most patients with AP will relieve spontaneously  
14 without any organ failure, while about 20% of cases will evolve into severe form, which is associated  
15 with MODS, sepsis, and high mortality [6]. Thus, it is imperative to identify patients who might develop  
16 severe AP and initiate more aggressive intervention [26]. Through early identification and reasonable  
17 treatment, patients at high risk of mortality might be converted to low risk, which is the main goal of our  
18 model development.

19 Using demographic, clinical and conventional laboratory data from a large-scale publicly available ICU  
20 database, the following independent risk factors for predicting in-hospital mortality of AP were identified:  
21 age, BUN, and lactate (ABL). These factors are consistent with the risk factors traditionally associated

1 with in-hospital mortality. Except for age, other risk factors are modifiable by timely and aggressive  
2 treatment, which is particularly important for improving outcomes. Nomograms could provide predictive  
3 information tailored to the individual, by establishing a simple graphical representation of a complex  
4 statistical prediction model [34]. Currently, nomograms are increasingly being used to improve clinical  
5 decision making. In this study, we incorporated age, BUN and lactate into an easy-to-use and reliable  
6 nomogram model ABL. Our predictive model also generates an equation on a continuous scale rather  
7 than an arbitrary “cutoff” for each parameter. The outstanding advantage of the nomogram model ABL  
8 is its simplicity and accuracy. There are only three parameters in the current model, which requires no  
9 extra calculations and is convenient for clinicians. In addition, all these parameters are objective and can  
10 be easily obtained following a general hospital admission. We calculated the C-index to quantify the  
11 discriminatory power of our model. A C-index of 1 represents perfect prediction accuracy, whereas a C-  
12 index of 0.5 indicates no better than random guesses. With a C-index of 0.896, the nomogram model  
13 ABL exhibited perfect model discrimination performance. The ROC curve also showed that the  
14 nomogram model ABL provide great model prediction accuracy. Internal validation via bootstrap  
15 resamples demonstrated an adjusted C-index of 0.892, which was in excellent agreement with the original  
16 data. Moreover, the calibration curve indicated a sufficient fit of predicted and actual in-hospital mortality.  
17 This user-friendly nomogram model ABL might be a valuable tool for clinical practice because it could  
18 provide a simple and accurate way to predict in-hospital mortality in patients with AP.

19 As is well known to all, age is an important and useful indicator of poor prognosis in various entities.  
20 Furthermore, many acknowledged predictive models have incorporated age for predicting the severity or  
21 mortality of AP in the field of clinical medicine [7, 14]. Our study also demonstrates that age is an  
22 independent risk factor for in-hospital mortality in patients with AP. With age incremented by 10 years,

1 the risk for in-hospital mortality was increased by 6.776% in our study.

2 In this study, we found that hyperlactatemia ( $\geq 2$ mmol/L) were very common in AP (50.131%). Lactate,  
3 a byproduct of glycolysis under anaerobic conditions, is generally considered as a powerful indicator of  
4 ischemia and hypoxia in body tissues. However, diseases with elevated plasma catecholamine, such as  
5 huge trauma or shock, can also lead to exaggerated glycolysis and increased lactate level [36-38].  
6 Hyperlactatemia in AP might be related to the above factors. Single plasma lactate level, especially that  
7 measured immediately after admission to the ICU or arrival at the emergency room, is regarded as a  
8 powerful predictor of subsequent multiorgan failure and mortality. In 1965, Peretz et al. [39] first  
9 described the relationship between plasma lactate level and mortality and revealed a death rate of 100%  
10 when the plasma lactate level is higher than 13.3 mmol/L. More recently, Nichol et al. [40] and Haas et  
11 al. [41] also found that the mortality rate of patients with a plasma lactate level greater than 10 mmol/L  
12 was up to 80%. Recent studies demonstrated that early lactate clearance and continuous dynamic  
13 monitoring of the plasma lactate level could serve as a useful prognostic factor and guide timely  
14 intervention of critically ill patients [41-46]. In 2017, Valverde-López et al. [47] reported that elevated  
15 plasma lactate level was closely related to persistent multiorgan failure of patients with AP, lactate might  
16 become a useful biomarker for predicting poor clinical outcomes of AP on admission, especially for the  
17 prediction of mortality, lactate exhibited an excellent AUROC of 0.870. Moreover, lactate performed  
18 much better than CRP in predicting ICU requirements and mortality [47]. Our research demonstrated  
19 that the lactate level was strongly associated with in-hospital mortality of AP, with a great AUROC of  
20 0.776. By multivariate logistic regression analysis, lactate has been proven to be an independent risk  
21 factor for predicting in-hospital mortality, which is consistent with previous studies [47].  
22 BUN as a useful predictor of in-hospital mortality is consistent with the current existing literature.

1  
2  
3  
4 1 Previous studies have shown that BUN on admission and BUN rise in the first 24 hours following  
5  
6 2 admission can predict mortality of patients with AP [29, 48-51]. Many studies believe that increased  
7  
8  
9 3 BUN in AP is owing to the loss of body fluid, the decrease of intravascular blood volume, and the  
10  
11 4 development of prerenal azotemia [48, 50]. If the hypovolemic state cannot be corrected completely at  
12  
13  
14 5 early stage, the patients will suffer from further depletion of effective circulatory blood volume, from  
15  
16  
17 6 severe decrease in glomerular filtration fraction and eventually leading to prerenal insufficiency. If the  
18  
19  
20 7 disease progresses further, it may lead to multiple organ and system failure, which is the main cause of  
21  
22 8 death [10, 28]. Therefore, many scoring systems used in clinical practice are based on the urea level  
23  
24  
25 9 (Ranson, Glasgow, POP, BISAP) [7, 52-54]. The Hong Kong criterion is based on only two parameters,  
26  
27  
28 10 the urea, and glycemia [55].

29  
30 11 In order to further evaluate the value of nomogram model ABL in clinical use, we compared its  
31  
32 12 performance with the APACHE scoring system. APACHE II is one of the most powerful and widely  
33  
34  
35 13 used prognostic tool for all ICU patients to predict severity and mortality. Later this scoring system was  
36  
37  
38 14 extrapolated to AP, the study results showing perfect prognostic value [15, 56]. The APACHE II had  
39  
40  
41 15 been modified many times since its launch in 1985, and the latest version was the APACHE IV published  
42  
43  
44 16 in 2006 [57, 58]. Involving about 52 different physiologic indexes, APACHE IV accounts for  
45  
46  
47 17 hepatobiliary parameters, sedation status, and multiple comorbidities simultaneously. Due to such wide  
48  
49  
50 18 range of physiologic variables, APACHE IV has a much better performance compared with APACHE II  
51  
52  
53 19 [59, 60]. In 2015, a study reported that an APACHE IV of 44 or higher would predict mortality in 100%  
54  
55  
56 20 of cases, and the AUROC for APACHE IV was 0.93 [61]. However, the main drawback of APACHE IV  
57  
58  
59 21 is that it relies on many variables that are not routinely collected during general hospital admission [7].  
60  
22 22 Nevertheless, our nomogram model ABL could attain a comparable predictive accuracy of the more

1 complex APACHE IV with fewer parameters in patients with AP.

2 An ideal predictive model should be reliable and easy-to-use at the early stage of the disease, using

3 readily available data [62]. The nomogram model ABL achieves many of these characteristics: it is

4 generated from data within 24 hours after admission, using age and some easily obtainable, reliable, and

5 inexpensive clinical and laboratory parameters in a model, and is feasible in a user-friendly manner.

6 Moreover, the nomogram model ABL presents an excellent prognostic ability for in-hospital mortality,

7 which is comparable to that of APACHE IV.

8 Our study still has some limitations. First, this study included patients with AP from one database, due

9 to the small sample size and small number of events, the statistical power of this study was limited, which

10 may caution us from generalizing this nomogram model ABL to a larger population. And thus, further

11 large-scale prospective trials are needed to verify the prognostic model. Second, although we tried to

12 adjust confounding factors as much as possible by performing multivariate logistic regression analysis,

13 residual confounding factors through unknown or unmeasured covariates might not be completely ruled

14 out. Finally, the database that we used did not cover information on etiology, initial or recurrent episodes

15 of pancreatitis, duration of the disease, which might affect in-hospital mortality.

## 16 **Conclusion**

17 We propose a refined nomogram model ABL with age, easily obtainable clinical and biochemical

18 parameters, the BUN and lactate. This nomogram model ABL shows excellent performance and allows

19 clinical practitioners to perform early and quick risk-stratification and guide early management strategies

20 for AP patients.



## 1 Abbreviations

2 AP: acute pancreatitis; eICU-CRD: eICU Collaborative Research Database; C-index: concordance index;  
3 ICU: intensive care unit; CI: confidence interval; MODS: multiple organ dysfunction syndromes; CTSI:  
4 computed tomography severity index; TRIPOD: Transparent Reporting of a multivariable prediction  
5 model for Individual Prognosis Or Diagnosis; BT: body temperature; HR: heart rate; MBP: mean blood  
6 pressure; RR: respiratory rate; GCS: Glasgow Coma Scale; BE: base excess; BUN: blood urea nitrogen;  
7 WBC: white blood cell; PLT: platelet; LDH: lactic dehydrogenase; AST: aspartate aminotransferase;  
8 PaO<sub>2</sub>: arterial oxygen pressure; SD: standard deviation; OR: odds ratio; AUROC: area under the receiver  
9 operator characteristic curve; BMI: body mass index; IQR: interquartile range; Med-Surg ICU: medical-  
10 surgical intensive care unit; MICU: medical intensive care unit; SICU: surgical intensive care unit; DM:  
11 diabetes mellitus; COPD: chronic obstructive pulmonary diseases; CHF: chronic heart failure; MI:  
12 myocardial infarction; RI: renal insufficiency; ROC: receiver operating characteristic; IDI: integrated  
13 discrimination improvement index; APACHE: Acute Physiology, Age and Chronic Health Evaluation.

## 14 Declarations

15 **Conflicts of interest:** The authors declare that they have no conflict of interest.

16 **Acknowledgments:** Not applicable.

17 **Funding:** There is no funding.

18 **Availability of data and material:** The data were available on the eICU-CRD website at

19 <https://eicu-crd.mit.edu/>.

20 **Authors' contributions:** Caifeng Li conceived the idea, extracted the data, performed the analysis, and

1 drafted the manuscript. Guolin Wang and Zhiqiang Wang helped to frame the idea of the study, interpret  
2 the results and revise the manuscript. Qian Ren helped to edit pictures and revised the manuscript. All  
3 authors read and approved the final manuscript.

4 **Ethics approval and consent to participate:** The study was an analysis of a third-party anonymized  
5 publicly available database with pre-existing institutional review board approval. Informed consent was  
6 not required in this database study because of the non-identifying and anonymous nature of the database.

7 **Consent for publication:** All authors consent to publication.

8 **Patient and public involvement:** No patient involved.

## REFERENCE

1. Lee PJ, Papachristou GI, (2019) New insights into acute pancreatitis. *Nature reviews Gastroenterology & hepatology* 16: 479-496
2. Nassar TI, Qunibi WY, (2019) AKI Associated with Acute Pancreatitis. *Clinical journal of the American Society of Nephrology : CJASN* 14: 1106-1115
3. Pavlidis P, Crichton S, Lemmich Smith J, Morrison D, Atkinson S, Wyncoll D, Ostermann M, (2013) Improved outcome of severe acute pancreatitis in the intensive care unit. *Critical care research and practice* 2013: 897107
4. Banks PA, Freeman ML, (2006) Practice guidelines in acute pancreatitis. *The American journal of gastroenterology* 101: 2379-2400
5. Pieńkowska J, Gwoździewicz K, Skrobisz-Balandowska K, Marek I, Kostro J, Szurowska E, Studniarek M, (2016) Perfusion-CT--Can We Predict Acute Pancreatitis Outcome within the First 24 Hours from the Onset of Symptoms? *PloS one* 11: e0146965
6. Whitcomb DC, (2006) Clinical practice. Acute pancreatitis. *The New England journal of medicine* 354: 2142-2150
7. Wu BU, Johannes RS, Sun X, Tabak Y, Conwell DL, Banks PA, (2008) The early prediction of mortality in acute pancreatitis: a large population-based study. *Gut* 57: 1698-1703
8. Ponette J, Wilmer A, (2001) Update on the management of acute severe pancreatitis. *Acta clinica Belgica* 56: 135-145
9. Mutinga M, Rosenbluth A, Tenner SM, Odze RR, Sica GT, Banks PA, (2000) Does mortality occur early or late in acute pancreatitis? *International journal of pancreatology : official journal of the International Association of Pancreatology* 28: 91-95
10. Gloor B, Müller CA, Worni M, Martignoni ME, Uhl W, Büchler MW, (2001) Late mortality in patients with severe acute pancreatitis. *The British journal of surgery* 88: 975-979
11. Lowham A, Lavelle J, Leese T, (1999) Mortality from acute pancreatitis. *International journal of pancreatology : official journal of the International Association of Pancreatology* 25: 103-106
12. Forsmark CE, Baillie J, (2007) AGA Institute technical review on acute pancreatitis. *Gastroenterology* 132: 2022-2044
13. Srinivasan G, Venkatakrisnan L, Sambandam S, Singh G, Kaur M, Janarthan K, John BJ, (2016) Current concepts in the management of acute pancreatitis. *Journal of family medicine and primary care* 5: 752-758
14. Di MY, Liu H, Yang ZY, Bonis PA, Tang JL, Lau J, (2016) Prediction Models of Mortality in Acute Pancreatitis in Adults: A Systematic Review. *Annals of internal medicine* 165: 482-490
15. Larvin M, McMahon MJ, (1989) APACHE-II score for assessment and monitoring of acute pancreatitis. *Lancet (London, England)* 2: 201-205
16. Kumaravel A, Stevens T, Papachristou GI, Muddana V, Bhatt A, Lee PJ, Holmes J, Lopez R, Whitcomb DC, Parsi MA, (2015) A Model to Predict the Severity of Acute Pancreatitis Based on Serum Level of Amylase and Body Mass Index. *Clinical gastroenterology and hepatology : the official clinical practice journal of the American Gastroenterological Association* 13: 1496-1501

17. Chauhan S, Forsmark CE, (2010) The difficulty in predicting outcome in acute pancreatitis. *The American journal of gastroenterology* 105: 443-445
18. Gao W, Yang HX, Ma CE, (2015) The Value of BISAP Score for Predicting Mortality and Severity in Acute Pancreatitis: A Systematic Review and Meta-Analysis. *PloS one* 10: e0130412
19. Yang YX, Li L, (2016) Evaluating the Ability of the Bedside Index for Severity of Acute Pancreatitis Score to Predict Severe Acute Pancreatitis: A Meta-Analysis. *Medical principles and practice : international journal of the Kuwait University, Health Science Centre* 25: 137-142
20. Yang CJ, Chen J, Phillips AR, Windsor JA, Petrov MS, (2014) Predictors of severe and critical acute pancreatitis: a systematic review. *Digestive and liver disease : official journal of the Italian Society of Gastroenterology and the Italian Association for the Study of the Liver* 46: 446-451
21. Balthazar EJ, Robinson DL, Megibow AJ, Ranson JH, (1990) Acute pancreatitis: value of CT in establishing prognosis. *Radiology* 174: 331-336
22. Bollen TL, Singh VK, Maurer R, Repas K, van Es HW, Banks PA, Morteke KJ, (2012) A comparative evaluation of radiologic and clinical scoring systems in the early prediction of severity in acute pancreatitis. *The American journal of gastroenterology* 107: 612-619
23. Spanier BW, Nio Y, van der Hulst RW, Tuynman HA, Dijkgraaf MG, Bruno MJ, (2010) Practice and yield of early CT scan in acute pancreatitis: a Dutch Observational Multicenter Study. *Pancreatology : official journal of the International Association of Pancreatology (IAP) [et al]* 10: 222-228
24. Pollard TJ, Johnson AEW, Raffa JD, Celi LA, Mark RG, Badawi O, (2018) The eICU Collaborative Research Database, a freely available multi-center database for critical care research. *Scientific data* 5: 180178
25. Collins GS, Reitsma JB, Altman DG, Moons KG, (2015) Transparent reporting of a multivariable prediction model for individual prognosis or diagnosis (TRIPOD): the TRIPOD Statement. *BMC medicine* 13: 1
26. Tenner S, Baillie J, DeWitt J, Vege SS, (2013) American College of Gastroenterology guideline: management of acute pancreatitis. *The American journal of gastroenterology* 108: 1400-1415; 1416
27. Jiang X, Su Z, Wang Y, Deng Y, Zhao W, Jiang K, Sun C, (2019) Prognostic nomogram for acute pancreatitis patients: An analysis of publicly electronic healthcare records in intensive care unit. *Journal of critical care* 50: 213-220
28. Al Mofleh IA, (2008) Severe acute pancreatitis: pathogenetic aspects and prognostic factors. *World journal of gastroenterology* 14: 675-684
29. Wu BU, (2011) Prognosis in acute pancreatitis. *CMAJ : Canadian Medical Association journal = journal de l'Association medicale canadienne* 183: 673-677
30. Hosmer DW, Hosmer T, Le Cessie S, Lemeshow S, (1997) A comparison of goodness-of-fit tests for the logistic regression model. *Statistics in medicine* 16: 965-980
31. DeLong ER, DeLong DM, Clarke-Pearson DL, (1988) Comparing the areas under two or more correlated receiver operating characteristic curves: a nonparametric approach. *Biometrics* 44: 837-845
32. Steyerberg EW, Harrell FE, Jr., Borsboom GJ, Eijkemans MJ, Vergouwe Y, Habbema JD,

1  
2  
3  
4  
5  
6  
7  
8  
9  
10  
11  
12  
13  
14  
15  
16  
17  
18  
19  
20  
21  
22  
23  
24  
25  
26  
27  
28  
29  
30  
31  
32  
33  
34  
35  
36  
37  
38  
39  
40  
41  
42  
43  
44  
45  
46  
47  
48  
49  
50  
51  
52  
53  
54  
55  
56  
57  
58  
59  
60

- (2001) Internal validation of predictive models: efficiency of some procedures for logistic regression analysis. *Journal of clinical epidemiology* 54: 774-781
33. Royston P, Altman DG, (2013) External validation of a Cox prognostic model: principles and methods. *BMC medical research methodology* 13: 33
34. Iasonos A, Schrag D, Raj GV, Panageas KS, (2008) How to build and interpret a nomogram for cancer prognosis. *Journal of clinical oncology : official journal of the American Society of Clinical Oncology* 26: 1364-1370
35. van Smeden M, Moons KGM, (2017) Event rate net reclassification index and the integrated discrimination improvement for studying incremental value of risk markers. *Statistics in medicine* 36: 4495-4497
36. Renew JR, Barbara DW, Hyder JA, Dearani JA, Rivera M, Pulido JN, (2016) Frequency and outcomes of severe hyperlactatemia after elective cardiac surgery. *The Journal of thoracic and cardiovascular surgery* 151: 825-830
37. Raper RF, Cameron G, Walker D, Bowey CJ, (1997) Type B lactic acidosis following cardiopulmonary bypass. *Critical care medicine* 25: 46-51
38. Totaro RJ, Raper RF, (1997) Epinephrine-induced lactic acidosis following cardiopulmonary bypass. *Critical care medicine* 25: 1693-1699
39. Peretz DI, Scott HM, Duff J, Dossetor JB, MacLean LD, McGregor M, (1965) The significance of lacticacidemia in the shock syndrome. *Annals of the New York Academy of Sciences* 119: 1133-1141
40. Nichol AD, Egi M, Pettila V, Bellomo R, French C, Hart G, Davies A, Stachowski E, Reade MC, Bailey M, Cooper DJ, (2010) Relative hyperlactatemia and hospital mortality in critically ill patients: a retrospective multi-centre study. *Critical care (London, England)* 14: R25
41. Haas SA, Lange T, Saugel B, Petzoldt M, Fuhrmann V, Metschke M, Kluge S, (2016) Severe hyperlactatemia, lactate clearance and mortality in unselected critically ill patients. *Intensive care medicine* 42: 202-210
42. Nguyen HB, Rivers EP, Knoblich BP, Jacobsen G, Muzzin A, Ressler JA, Tomlanovich MC, (2004) Early lactate clearance is associated with improved outcome in severe sepsis and septic shock. *Critical care medicine* 32: 1637-1642
43. Arnold RC, Shapiro NI, Jones AE, Schorr C, Pope J, Casner E, Parrillo JE, Dellinger RP, Trzeciak S, (2009) Multicenter study of early lactate clearance as a determinant of survival in patients with presumed sepsis. *Shock (Augusta, Ga)* 32: 35-39
44. Vincent JL, Quintairos ESA, Couto L, Jr., Taccone FS, (2016) The value of blood lactate kinetics in critically ill patients: a systematic review. *Critical care (London, England)* 20: 257
45. Varis E, Pettilä V, Poukkanen M, Jakob SM, Karlsson S, Perner A, Takala J, Wilkman E, (2017) Evolution of Blood Lactate and 90-Day Mortality in Septic Shock. A Post Hoc Analysis of the FINNAKI Study. *Shock (Augusta, Ga)* 47: 574-581
46. Zhang Z, Xu X, (2014) Lactate clearance is a useful biomarker for the prediction of all-cause mortality in critically ill patients: a systematic review and meta-analysis\*. *Critical care medicine* 42: 2118-2125
47. Valverde-López F, Matas-Cobos AM, Alegría-Motte C, Jiménez-Rosales R, Úbeda-Muñoz M, Redondo-Cerezo E, (2017) BISAP, RANSON, lactate and others biomarkers in prediction of severe acute pancreatitis in a European cohort. *Journal of gastroenterology and hepatology* 32:

- 1649-1656
48. Jordanov P, Grigorov G, (2012) Predictors of mortality in acute pancreatitis: a retrospective study
49. Wu BU, Bakker OJ, Papachristou GI, Besselink MG, Repas K, van Santvoort HC, Muddana V, Singh VK, Whitcomb DC, Gooszen HG, Banks PA, (2011) Blood urea nitrogen in the early assessment of acute pancreatitis: an international validation study. *Archives of internal medicine* 171: 669-676
50. Wu BU, Johannes RS, Sun X, Conwell DL, Banks PA, (2009) Early changes in blood urea nitrogen predict mortality in acute pancreatitis. *Gastroenterology* 137: 129-135
51. Lin S, Hong W, Basharat Z, Wang Q, Pan J, Zhou M, (2017) Blood Urea Nitrogen as a Predictor of Severe Acute Pancreatitis Based on the Revised Atlanta Criteria: Timing of Measurement and Cutoff Points. *Canadian journal of gastroenterology & hepatology* 2017: 9592831
52. Ranson JH, Pasternack BS, (1977) Statistical methods for quantifying the severity of clinical acute pancreatitis. *The Journal of surgical research* 22: 79-91
53. Blamey SL, Imrie CW, O'Neill J, Gilmour WH, Carter DC, (1984) Prognostic factors in acute pancreatitis. *Gut* 25: 1340-1346
54. Harrison DA, D'Amico G, Singer M, (2007) The Pancreatitis Outcome Prediction (POP) Score: a new prognostic index for patients with severe acute pancreatitis. *Critical care medicine* 35: 1703-1708
55. Fan ST, Lai EC, Mok FP, Lo CM, Zheng SS, Wong J, (1993) Prediction of the severity of acute pancreatitis. *American journal of surgery* 166: 262-268; discussion 269
56. Yeung YP, Lam BY, Yip AW, (2006) APACHE system is better than Ranson system in the prediction of severity of acute pancreatitis. *Hepatobiliary & pancreatic diseases international : HBPD INT* 5: 294-299
57. Zimmerman JE, Wagner DP, Draper EA, Wright L, Alzola C, Knaus WA, (1998) Evaluation of acute physiology and chronic health evaluation III predictions of hospital mortality in an independent database. *Critical care medicine* 26: 1317-1326
58. Zimmerman JE, Kramer AA, McNair DS, Malila FM, (2006) Acute Physiology and Chronic Health Evaluation (APACHE) IV: hospital mortality assessment for today's critically ill patients. *Critical care medicine* 34: 1297-1310
59. Zimmerman JE, Kramer AA, (2008) Outcome prediction in critical care: the Acute Physiology and Chronic Health Evaluation models. *Current opinion in critical care* 14: 491-497
60. Shrope-Mok SR, Propst KA, Iyengar R, (2010) APACHE IV versus PPI for predicting community hospital ICU mortality. *The American journal of hospice & palliative care* 27: 243-247
61. Mok SR, Mohan S, Elfant AB, Judge TA, (2015) The Acute Physiology and Chronic Health Evaluation IV, a New Scoring System for Predicting Mortality and Complications of Severe Acute Pancreatitis. *Pancreas* 44: 1314-1319
62. Vogenberg FR, (2009) Predictive and prognostic models: implications for healthcare decision-making in a modern recession. *American health & drug benefits* 2: 218-222

1 Table 1. Characteristics and outcomes of participants

| Characteristics                | Survived to Discharge<br>(Overall number = 709) | n   | Died in the Hospital<br>(Overall number = 33) | n  | <i>P</i><br>Value |
|--------------------------------|-------------------------------------------------|-----|-----------------------------------------------|----|-------------------|
| <b>Demographics</b>            |                                                 |     |                                               |    |                   |
| Age (median [IQR])             | 51.00 [40.00, 63.00]                            |     | 65.00 [60.00, 78.00]                          |    | <0.001            |
| Gender male, n (%)             | 427 (60.2)                                      |     | 24 (72.7)                                     |    | 0.209             |
| Ethnicity, n (%)               |                                                 |     |                                               |    | 0.348             |
| African American               | 49 (7.0)                                        |     | 5 (15.2)                                      |    |                   |
| Asian                          | 9 (1.3)                                         |     | 0 (0.0)                                       |    |                   |
| Caucasian                      | 542 (77.2)                                      |     | 25 (75.8)                                     |    |                   |
| Hispanic                       | 34 (4.8)                                        |     | 1 (3.0)                                       |    |                   |
| Native American                | 8 (1.1)                                         |     | 1 (3.0)                                       |    |                   |
| Other/Unknown                  | 60 (8.5)                                        |     | 1 (3.0)                                       |    |                   |
| Height (cm, median [IQR])      | 172.00 [163.00, 178.00]                         | 702 | 172.70 [165.10, 178.43]                       | 32 | 0.685             |
| Weight (kg, median [IQR])      | 83.90 [70.90, 98.10]                            | 692 | 93.30 [78.97, 103.50]                         | 32 | 0.037             |
| <b>Clinical Factors</b>        |                                                 |     |                                               |    |                   |
| ICU type, n (%)                |                                                 |     |                                               |    | 0.002             |
| Med-Surg ICU                   | 485 (68.4)                                      |     | 20 (60.6)                                     |    |                   |
| MICU                           | 76 (10.7)                                       |     | 0 (0.0)                                       |    |                   |
| SICU                           | 55 (7.8)                                        |     | 10 (30.3)                                     |    |                   |
| Other ICUs                     | 93(13.1)                                        |     | 3(9.1)                                        |    |                   |
| Comorbidities, n (%)           |                                                 |     |                                               |    |                   |
| CHF                            | 37 (5.3)                                        |     | 6 (18.2)                                      |    | 0.007             |
| COPD                           | 67 (9.6)                                        |     | 7 (21.2)                                      |    | 0.062             |
| Hypertension                   | 317 (45.4)                                      |     | 23 (69.7)                                     |    | 0.01              |
| DM                             | 105 (15.0)                                      |     | 4 (12.1)                                      |    | 0.836             |
| MI                             | 26 (3.7)                                        |     | 2 (6.1)                                       |    | 0.825             |
| RI                             | 38 (5.4)                                        |     | 4 (12.1)                                      |    | 0.218             |
| Vital signs                    |                                                 |     |                                               |    |                   |
| BT (°C, median [IQR])          | 36.70 [36.40, 36.90]                            | 611 | 36.60 [36.40, 36.82]                          | 28 | 0.509             |
| RR (/min, median [IQR])        | 30.00 [12.00, 37.00]                            | 648 | 33.00 [27.00, 39.00]                          | 29 | 0.113             |
| HR (/min, median [IQR])        | 118.00 [102.00, 134.00]                         | 647 | 120.00 [100.00, 135.00]                       | 29 | 0.908             |
| MBP (mm Hg, median [IQR])      | 98.00 [60.00, 125.50]                           | 647 | 51.00 [43.00, 70.00]                          | 29 | <0.001            |
| APACHE IV (median [IQR])       | 46.00 [34.00, 62.00]                            | 579 | 90.00 [71.00, 105.00]                         | 27 | <0.001            |
| GCS (median [IQR])             | 15.00 [14.00, 15.00]                            | 709 | 13.00 [10.00, 15.00]                          | 33 | <0.001            |
| Invasive intervention, n (%)   |                                                 |     |                                               |    |                   |
| Operation                      | 36 (5.1)                                        |     | 3 (9.1)                                       |    | 0.541             |
| Intubation                     | 34 (5.2)                                        |     | 7 (24.1)                                      |    | <0.001            |
| Ventilation                    | 53 (8.1)                                        |     | 9 (31.0)                                      |    | <0.001            |
| Dialysis                       | 9 (1.4)                                         |     | 2 (6.9)                                       |    | 0.12              |
| <b>Laboratory Data</b>         |                                                 |     |                                               |    |                   |
| Albumin (g/dL, median [IQR])   | 2.90 [2.40, 3.40]                               | 660 | 2.40 [1.95, 2.80]                             | 31 | <0.001            |
| Lactate (mmol/L, median [IQR]) | 1.90 [1.20, 3.10],                              | 359 | 5.20 [2.20, 8.57]                             | 21 | <0.001            |



|                                       |                          |     |                          |    |        |
|---------------------------------------|--------------------------|-----|--------------------------|----|--------|
| BE (mEq/L, median [IQR])              | -3.20 [-7.00, 0.50]      | 170 | -5.10 [-9.20, -3.00]     | 13 | 0.245  |
| Total bilirubin (mg/dL, median [IQR]) | 1.00 [0.60, 2.30]        | 449 | 2.10 [0.80, 3.90]        | 25 | 0.105  |
| Glucose (mg/dL, median [IQR])         | 167.00 [128.00, 237.75]  | 694 | 194.00 [162.00, 247.00]  | 33 | 0.065  |
| BUN (mg/dL, median [IQR])             | 18.00 [12.00, 31.00]     | 697 | 37.00 [23.00, 54.00]     | 33 | <0.001 |
| WBC ( $\times 10^9/L$ , median [IQR]) | 10.80 [7.37, 15.70]      | 533 | 14.00 [7.85, 23.70]      | 28 | 0.106  |
| Hematocrit (% , median [IQR])         | 34.90 [30.50, 39.88]     | 538 | 33.00 [29.08, 37.18]     | 28 | 0.272  |
| PLT (% , median [IQR])                | 178.50 [126.00, 241.00]  | 676 | 172.00 [118.00, 236.00]  | 33 | 0.634  |
| Calcium (mg/dL, median [IQR])         | 7.80 [7.20, 8.30]        | 669 | 7.45 [6.50, 8.20]        | 32 | 0.129  |
| LDH (Units/L, median [IQR])           | 350.00 [236.00, 557.50]  | 99  | 469.50 [317.25, 634.50]  | 6  | 0.439  |
| AST (Units/L, median [IQR])           | 67.00 [32.00, 160.25]    | 664 | 110.00 [39.00, 301.50]   | 31 | 0.052  |
| Cholesterol (mg/dL, median [IQR])     | 191.00 [127.50, 296.00]  | 215 | 137.00 [137.00, 137.00]  | 1  | 0.466  |
| Triglycerides (mg/dL, median [IQR])   | 188.00 [105.75, 1083.75] | 320 | 189.00 [151.00, 374.00]  | 11 | 0.946  |
| Amylase (Units/L, median [IQR])       | 362.00 [112.00, 949.00]  | 277 | 581.60 [102.75, 1091.25] | 14 | 0.8    |
| Lipase (Units/L, median [IQR])        | 952.00 [364.00, 2995.00] | 581 | 1538.00 [75.50, 4323.50] | 22 | 0.887  |
| PaO2 (mmHg, median [IQR])             | 75.75 [67.00, 93.50]     | 92  | 98.50 [74.75, 101.75]    | 10 | 0.24   |

Abbreviations: IQR interquartile range, ICU intensive care unit, Med-Surg ICU medical-surgical intensive care unit, MICU medical intensive care unit, SICU surgical intensive care unit, CHF chronic heart failure, COPD chronic obstructive pulmonary diseases, DM diabetes mellitus, MI myocardial infarction, RI renal insufficiency, BT body temperature, RR respiratory rate, HR heart rate, MBP mean blood pressure, APACHE Acute Physiology, Age and Chronic Health Evaluation, GCS Glasgow Coma Scale, BE base excess, BUN blood urea nitrogen, WBC white blood cell, PLT platelet, LDH lactic dehydrogenase, AST aspartate aminotransferase, PaO2 arterial oxygen pressure.



1 Table 2. Univariate and multivariate logistic regression analysis with stepwise variable selection

|                         | Univariate analysis |               |         | Multivariate analysis |                |         |
|-------------------------|---------------------|---------------|---------|-----------------------|----------------|---------|
|                         | OR                  | 95%CI         | P Value | OR                    | 95%CI          | P Value |
| <b>Demographics</b>     |                     |               |         |                       |                |         |
| Age                     | 1.0538              | 1.0305-1.0792 | 0       | 1.0798                | 1.0174-1.16    | 0.0201  |
| Gender                  | 1.7611              | 0.8345-4.0548 | 0.1554  |                       |                |         |
| BMI                     | 1.0321              | 0.986-1.0756  | 0.1526  |                       |                |         |
| <b>Clinical Factors</b> |                     |               |         |                       |                |         |
| Comorbidities           |                     |               |         |                       |                |         |
| CHF                     | 3.976               | 1.415-9.66    | 0.0042  | 5.2176                | 0.6046-45.9861 | 0.1257  |
| COPD                    | 2.5396              | 0.9855-5.7822 | 0.0361  | 0.8789                | 0.1098-6.4035  | 0.8993  |
| Hypertension            | 2.7716              | 1.335-6.1756  | 0.0083  | 2.2653                | 0.5367-11.4279 | 0.2842  |
| DM                      | 0.7803              | 0.228-2.0334  | 0.6482  |                       |                |         |
| MI                      | 1.67                | 0.2617-5.9465 | 0.4978  |                       |                |         |
| RI                      | 2.3993              | 0.686-6.4923  | 0.1173  |                       |                |         |
| Vital signs             |                     |               |         |                       |                |         |
| BT                      | 0.9811              | 0.7461-1.4972 | 0.9175  |                       |                |         |
| RR                      | 1.0227              | 0.9959-1.0512 | 0.1018  |                       |                |         |
| HR                      | 0.9988              | 0.9867-1.0118 | 0.8491  |                       |                |         |
| MBP                     | 0.9797              | 0.9661-0.9914 | 0.0017  | 0.9909                | 0.9715-1.0072  | 0.3028  |
| GCS                     | 0.9178              | 0.8682-0.9755 | 0.0035  | 0.991                 | 0.8342-1.2101  | 0.9228  |
| <b>Laboratory Data</b>  |                     |               |         |                       |                |         |
| Albumin                 | 0.3357              | 0.1911-0.5761 | 0.0001  | 0.4189                | 0.108-1.5017   | 0.1882  |
| Lactate                 | 1.3811              | 1.2217-1.5719 | 0       | 1.6353                | 1.2683-2.2129  | 0.0004  |
| BE                      | 0.9559              | 0.8919-1.0274 | 0.2069  |                       |                |         |
| Total bilirubin         | 1.08                | 0.9749-1.174  | 0.0915  | 0.8698                | 0.629-1.0969   | 0.3193  |
| Glucose                 | 1.0009              | 0.9983-1.003  | 0.4174  |                       |                |         |
| BUN                     | 1.0245              | 1.0138-1.035  | 0       | 1.0278                | 1.0037-1.0523  | 0.0186  |
| WBC                     | 1.0501              | 1.0067-1.0913 | 0.0164  | 0.9748                | 0.9054-1.0448  | 0.4721  |
| Hematocrit              | 0.9724              | 0.9198-1.0259 | 0.3144  |                       |                |         |
| PLT                     | 0.9983              | 0.9942-1.0018 | 0.3698  |                       |                |         |
| Calcium                 | 0.7605              | 0.5565-1.0501 | 0.0916  | 0.9943                | 0.4857-2.1647  | 0.9878  |
| LDH                     | 0.9998              | 0.9971-1.0014 | 0.8382  |                       |                |         |
| AST                     | 1.0002              | 0.9999-1.0005 | 0.0946  | 0.9997                | 0.9987-1.0005  | 0.5251  |
| Cholesterol             | 0.9889              | 0.9421-1.0035 | 0.5197  |                       |                |         |
| Triglycerides           | 0.9996              | 0.9984-1.0001 | 0.2623  |                       |                |         |
| Amylase                 | 1                   | 0.9994-1.0004 | 0.8752  |                       |                |         |
| Lipase                  | 1                   | 0.9998-1.0002 | 0.796   |                       |                |         |
| PaO2                    | 1.0003              | 0.9824-1.0125 | 0.9619  |                       |                |         |

2 *Abbreviations:* AP acute pancreatitis, OR odds ratio, CI confidence interval, CHF chronic heart failure, COPD chronic obstructive  
3 pulmonary diseases, DM diabetes mellitus, MI myocardial infarction, RI renal insufficiency, BT body temperature, RR respiratory  
4 rate, HR heart rate, MBP mean blood pressure, GCS Glasgow Coma Scale, BE base excess, BUN blood urea nitrogen, WBC white  
5 blood cell, PLT platelet, LDH lactic dehydrogenase, AST aspartate aminotransferase, PaO2 arterial oxygen pressure.

1  
2  
3  
4 **Fig. 1** Flow chart of patient selection.  
5

6 **Fig. 2** Nomogram for predicting in-hospital mortality in AP. To obtain nomogram predicted in-hospital  
7 mortality, locate the value of each independent risk factor at each axis, draw a vertical line to the “Point”  
8  
9 mortality, locate the value of each independent risk factor at each axis, draw a vertical line to the “Point”  
10  
11 axis to get the point for each risk factor, then sum all the points, locate the sum on the “Total Points”  
12  
13 axis to get the predicted probability on “Predicted in-hospital mortality” axis. AP, acute pancreatitis  
14  
15  
16

17 **Fig. 3** (A) ROC curves for the nomogram model ABL and individual risk factors for predicting in-  
18 hospital mortality. AUROC represents the discrimination ability of a predictive model. (B) Calibration  
19  
20 plot comparing the actual and predicted in-hospital mortality. The x-axis indicates the deciles of predicted  
21  
22 in-hospital mortality. Each bar in the graph stands for the actual and predicted in-hospital mortality.  
23  
24  
25  
26  
27 ROC, receiver operating characteristic; AUROC, area under the receiver operator characteristic curve  
28  
29

30 **Fig. 4** Calibration curve of nomogram model ABL. The x-axis represents the predicted in-hospital  
31 mortality calculated according to the model, while the y-axis exhibits the actual in-hospital mortality.  
32  
33 The vertical lines show the frequency distribution of the predicted in-hospital mortality. The apparent  
34  
35 calibration curve (dotted line) indicates the model performance in the original data, while the bias-  
36  
37 corrected curve (solid line) represents the model performance after correction for optimism using 1000  
38  
39 bootstrapped resamples. Perfect prediction would fall on the 45-degree (dashed) reference line.  
40  
41  
42  
43  
44

45 **Fig. 5** (A) ROC curves for the nomogram model ABL and APACHE IV. Visual comparison of ROC  
46  
47 curves indicates the discrimination performance of the nomogram model ABL was comparable to that  
48  
49 of APACHE IV. (B) Decision curve analysis for the nomogram model ABL and the APACHE IV. The  
50  
51 y-axis measures the net benefit, and the x-axis shows the threshold probability. The horizontal black  
52  
53 line along the x-axis represents the assumption that no patient will die in the hospital (i.e., no patient  
54  
55 should undergo close monitoring and aggressive treatment), whereas the solid gray line represents the  
56  
57  
58  
59  
60

1  
2  
3  
4  
5  
6  
7  
8  
9  
10  
11  
12  
13  
14  
15  
16  
17  
18  
19  
20  
21  
22  
23  
24  
25  
26  
27  
28  
29  
30  
31  
32  
33  
34  
35  
36  
37  
38  
39  
40  
41  
42  
43  
44  
45  
46  
47  
48  
49  
50  
51  
52  
53  
54  
55  
56  
57  
58  
59  
60

1 assumption that all patients will die in the hospital (i.e., all patients should undergo close monitoring  
2 and aggressive treatment). The red line indicates the nomogram model ABL and the blue line  
3 represents the APACHE IV. ROC, receiver operating characteristic; APACHE, Acute Physiology,  
4 Age, and Chronic Health Evaluation  
5

For peer review only

1 746 patients with acute pancreatitis admitted  
2 to ICU from eICU database

3  
4  
5  
6 4 patients excluded due  
7 to loss of follow-up  
8  
9  
10

11  
12 742 patients were included for clinical  
13 characteristics analysis and risk factor selection  
14  
15  
16  
17

18  
19  
20  
21 364 patients with  
22 incomplete data excluded  
23  
24  
25  
26

27 378 eligible patients for nomogram  
28 development and useful evaluation  
29  
30  
31  
32



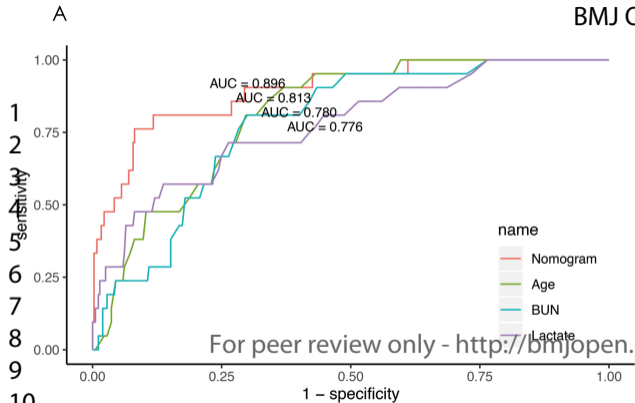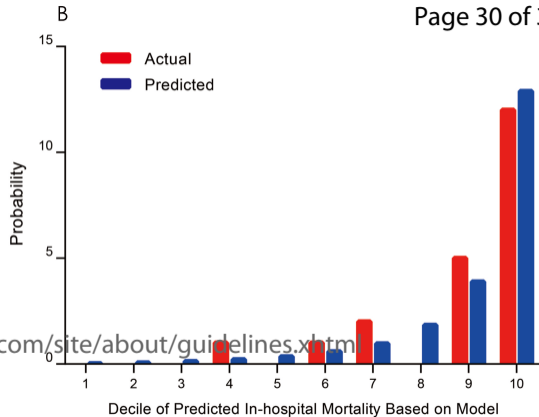

1  
2  
3  
4  
5  
6  
7  
8  
9  
10  
11  
12  
13  
14  
15  
16  
17  
18  
19

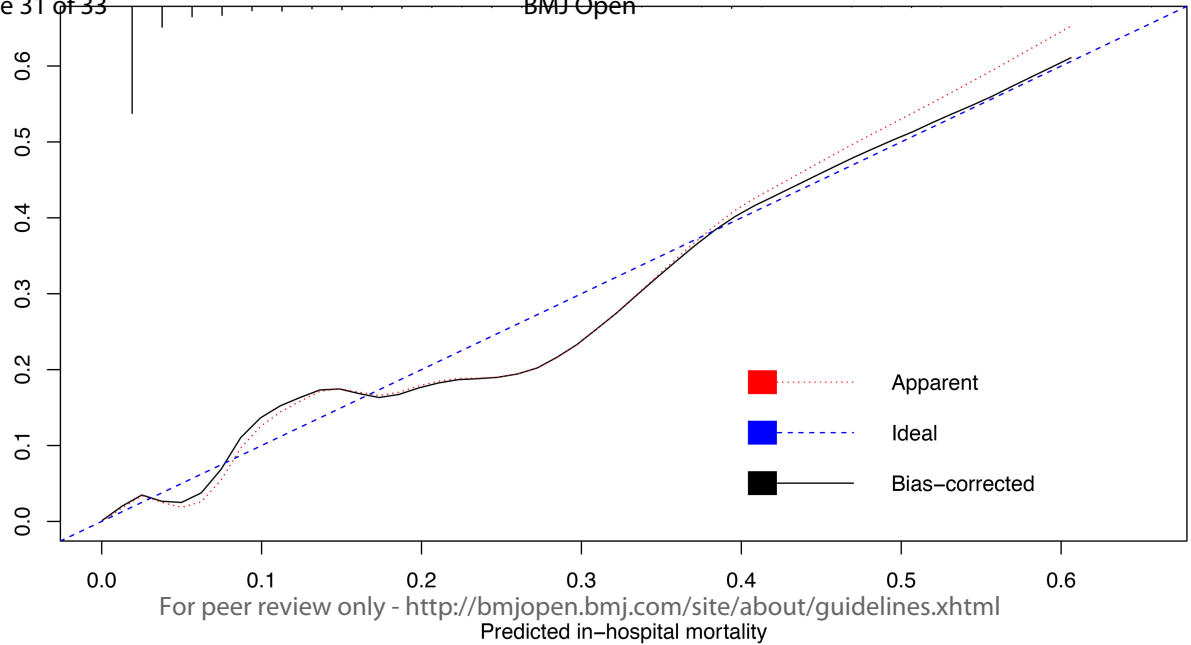

For peer review only - <http://bmjopen.bmj.com/site/about/guidelines.xhtml>

B= 1000 repetitions, boot

Mean absolute error=0.01 n=378

A

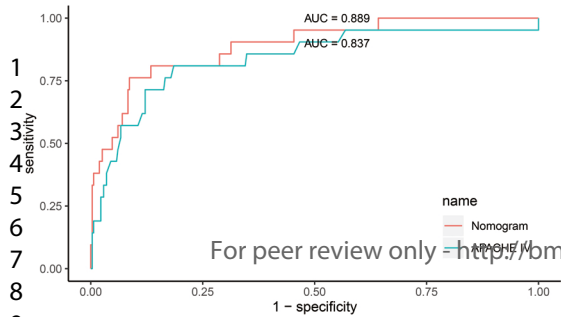

BMJ Open

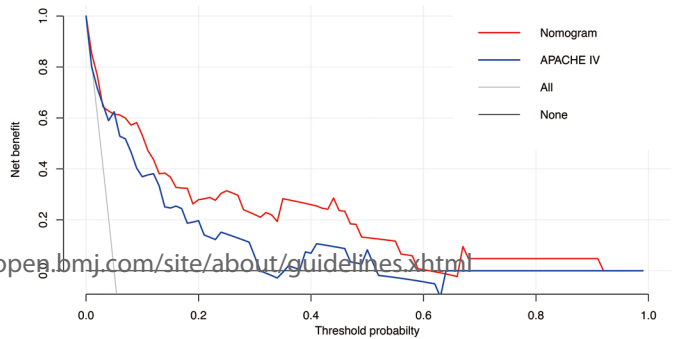

For peer review only - <http://bmjopen.bmj.com/site/about/guidelines.xhtml>



1 Table S. Characteristic of patients included and excluded from the development of the nomogram ABL

| Characteristics           | Patients included<br>(N=364) | Patients excluded<br>(N = 378) | P Value |
|---------------------------|------------------------------|--------------------------------|---------|
| <b>Demographics</b>       |                              |                                |         |
| Age (median [IQR])        | 52.00 [41.00, 65.00]         | 52.00 [40.00, 64.00]           | 0.523   |
| Gender male, n (%)        | 218 (59.9)                   | 233 (61.6)                     | 0.68    |
| Ethnicity, n (%)          |                              |                                | 0.91    |
| African American          | 28 ( 7.8)                    | 26 ( 6.9)                      |         |
| Asian                     | 4 ( 1.1)                     | 5 ( 1.3)                       |         |
| Caucasian                 | 274 (76.3)                   | 293 (77.9)                     |         |
| Hispanic                  | 18 ( 5.0)                    | 17 ( 4.5)                      |         |
| Native American           | 3 ( 0.8)                     | 6 ( 1.6)                       |         |
| Other/Unknown             | 32 ( 8.9)                    | 29 ( 7.7)                      |         |
| Height (cm, median [IQR]) | 172.70 [163.00, 178.00]      | 172.00 [163.80, 178.00]        | 0.946   |
| Weight (kg, median [IQR]) | 81.65 [69.00, 95.70]         | 86.19 [72.65, 100.15]          | 0.005   |
| <b>Clinical Factors</b>   |                              |                                |         |
| ICU type, n (%)           |                              |                                | 0.267   |
| Med-Surg ICU              | 252 (69.2)                   | 253 (66.9)                     |         |
| MICU                      | 43 (11.8)                    | 33 ( 8.7)                      |         |
| SICU                      | 28 ( 7.7)                    | 37 ( 9.8)                      |         |
| Other ICUs                | 41(11.3)                     | 55(14.6)                       |         |
| Comorbidities, n (%)      |                              |                                |         |
| CHF                       | 22 ( 6.1)                    | 21 ( 5.6)                      | 0.912   |
| COPD                      | 39 (10.8)                    | 35 ( 9.4)                      | 0.605   |
| Hypertension              | 163 (45.3)                   | 177 (47.6)                     | 0.582   |
| DM                        | 55 (15.3)                    | 54 (14.5)                      | 0.853   |
| MI                        | 12 ( 3.3)                    | 16 ( 4.3)                      | 0.624   |
| RI                        | 21 ( 5.8)                    | 21 ( 5.6)                      | 1       |
| GCS (median [IQR])        | 15.00 [14.00, 15.00]         | 15.00 [14.00, 15.00]           | 0.513   |
| In-hospital mortality     | 12 ( 3.3)                    | 21 ( 5.6)                      | 0.189   |

2 *Abbreviations:* IQR interquartile range, ICU intensive care unit, Med-Surg ICU medical-surgical intensive care unit, MICU medical  
3 intensive care unit, SICU surgical intensive care unit, CHF chronic heart failure, COPD chronic obstructive pulmonary diseases,  
4 DM diabetes mellitus, MI myocardial infarction, RI renal insufficiency, GCS Glasgow Coma Scale.

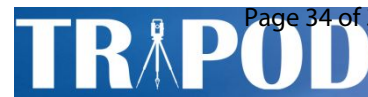

TRIPOD Checklist: Prediction Model Development and Validation

1  
2  
3  
4  
5  
6  
7  
8  
9  
10  
11  
12  
13  
14  
15  
16  
17  
18  
19  
20  
21  
22  
23  
24  
25  
26  
27  
28  
29  
30  
31  
32  
33  
34  
35  
36  
37  
38  
39  
40  
41  
42  
43  
44  
45  
46  
47  
48  
49  
50  
51  
52  
53  
54  
55  
56  
57  
58  
59  
60

| Section/Topic                | Item |     | Checklist Item                                                                                                                                                                                        | Page           |
|------------------------------|------|-----|-------------------------------------------------------------------------------------------------------------------------------------------------------------------------------------------------------|----------------|
| <b>Title and abstract</b>    |      |     |                                                                                                                                                                                                       |                |
| Title                        | 1    | D;V | Identify the study as developing and/or validating a multivariable prediction model, the target population, and the outcome to be predicted.                                                          | 1              |
| Abstract                     | 2    | D;V | Provide a summary of objectives, study design, setting, participants, sample size, predictors, outcome, statistical analysis, results, and conclusions.                                               | 2-3            |
| <b>Introduction</b>          |      |     |                                                                                                                                                                                                       |                |
| Background and objectives    | 3a   | D;V | Explain the medical context (including whether diagnostic or prognostic) and rationale for developing or validating the multivariable prediction model, including references to existing models.      | 3-4            |
|                              | 3b   | D;V | Specify the objectives, including whether the study describes the development or validation of the model or both.                                                                                     | 4              |
| <b>Methods</b>               |      |     |                                                                                                                                                                                                       |                |
| Source of data               | 4a   | D;V | Describe the study design or source of data (e.g., randomized trial, cohort, or registry data), separately for the development and validation data sets, if applicable.                               | 5-6            |
|                              | 4b   | D;V | Specify the key study dates, including start of accrual; end of accrual; and, if applicable, end of follow-up.                                                                                        | 5-6            |
| Participants                 | 5a   | D;V | Specify key elements of the study setting (e.g., primary care, secondary care, general population) including number and location of centres.                                                          | 5-6            |
|                              | 5b   | D;V | Describe eligibility criteria for participants.                                                                                                                                                       | 5-6            |
|                              | 5c   | D;V | Give details of treatments received, if relevant.                                                                                                                                                     | Not Applicable |
| Outcome                      | 6a   | D;V | Clearly define the outcome that is predicted by the prediction model, including how and when assessed.                                                                                                | 4              |
|                              | 6b   | D;V | Report any actions to blind assessment of the outcome to be predicted.                                                                                                                                | Not Applicable |
| Predictors                   | 7a   | D;V | Clearly define all predictors used in developing or validating the multivariable prediction model, including how and when they were measured.                                                         | 6              |
|                              | 7b   | D;V | Report any actions to blind assessment of predictors for the outcome and other predictors.                                                                                                            | Not applicable |
| Sample size                  | 8    | D;V | Explain how the study size was arrived at.                                                                                                                                                            | 8              |
| Missing data                 | 9    | D;V | Describe how missing data were handled (e.g., complete-case analysis, single imputation, multiple imputation) with details of any imputation method.                                                  | 9              |
| Statistical analysis methods | 10a  | D   | Describe how predictors were handled in the analyses.                                                                                                                                                 | 6-7            |
|                              | 10b  | D   | Specify type of model, all model-building procedures (including any predictor selection), and method for internal validation.                                                                         | 7              |
|                              | 10c  | V   | For validation, describe how the predictions were calculated.                                                                                                                                         | 7              |
|                              | 10d  | D;V | Specify all measures used to assess model performance and, if relevant, to compare multiple models.                                                                                                   | 7              |
|                              | 10e  | V   | Describe any model updating (e.g., recalibration) arising from the validation, if done.                                                                                                               | Not applicable |
| Risk groups                  | 11   | D;V | Provide details on how risk groups were created, if done.                                                                                                                                             | Not applicable |
| Development vs. validation   | 12   | V   | For validation, identify any differences from the development data in setting, eligibility criteria, outcome, and predictors.                                                                         | Not applicable |
| <b>Results</b>               |      |     |                                                                                                                                                                                                       |                |
| Participants                 | 13a  | D;V | Describe the flow of participants through the study, including the number of participants with and without the outcome and, if applicable, a summary of the follow-up time. A diagram may be helpful. | 8-9            |
|                              | 13b  | D;V | Describe the characteristics of the participants (basic demographics, clinical features, available predictors), including the number of participants with missing data for predictors and outcome.    | 8-9            |
|                              | 13c  | V   | For validation, show a comparison with the development data of the distribution of important variables (demographics, predictors and outcome).                                                        | Not applicable |
| Model development            | 14a  | D   | Specify the number of participants and outcome events in each analysis.                                                                                                                               | 9              |
|                              | 14b  | D   | If done, report the unadjusted association between each candidate predictor and outcome.                                                                                                              | 9              |
| Model specification          | 15a  | D   | Present the full prediction model to allow predictions for individuals (i.e., all regression coefficients, and model intercept or baseline survival at a given time point).                           | 9              |
|                              | 15b  | D   | Explain how to use the prediction model.                                                                                                                                                              | 9-10           |
| Model performance            | 16   | D;V | Report performance measures (with CIs) for the prediction model.                                                                                                                                      | 10-13          |
| Model-updating               | 17   | V   | If done, report the results from any model updating (i.e., model specification, model performance).                                                                                                   | Not applicable |
| <b>Discussion</b>            |      |     |                                                                                                                                                                                                       |                |
| Limitations                  | 18   | D;V | Discuss any limitations of the study (such as nonrepresentative sample, few events per predictor, missing data).                                                                                      | 16-17          |
| Interpretation               | 19a  | V   | For validation, discuss the results with reference to performance in the development data, and any other validation data.                                                                             | 13-14          |
|                              | 19b  | D;V | Give an overall interpretation of the results, considering objectives, limitations, results from similar studies, and other relevant evidence.                                                        | 13-16          |
| Implications                 | 20   | D;V | Discuss the potential clinical use of the model and implications for future research.                                                                                                                 | 16             |
| <b>Other information</b>     |      |     |                                                                                                                                                                                                       |                |
| Supplementary information    | 21   | D;V | Provide information about the availability of supplementary resources, such as study protocol, Web calculator, and data sets.                                                                         | Not applicable |
| Funding                      | 22   | D;V | Give the source of funding and the role of the funders for the present study.                                                                                                                         | Not applicable |

\*Items relevant only to the development of a prediction model are denoted by D, items relating solely to a validation of a prediction model are denoted by V, and items relating to both are denoted D;V. We recommend using the TRIPOD Checklist in conjunction with the TRIPOD Explanation and Elaboration document.
